# Supplementary material for: Reticuloendotheliosis virus and avian leukosis virus subgroup J synergistically increase the accumulation of exosomal miRNAs
Source: Retrovirology. 2018 Jul 3;15:45. doi: 10.1186/s12977-018-0427-0 (PMC6029113; doi:10.1186/s12977-018-0427-0)
Supplement: Supplementary file 3 — Additional file 3. The GO annotation of the predicted target genes of the differentially expressed miRNA between ExoRJ and ExoJ. A GO annotation of the predicted target genes revealed that 100 target genes were annotated significantly for the 54 differentially expressed miRNAs between ExoRJ and ExoJ. [file 12977_2018_427_MOESM3_ESM.xlsx]

## Sheet: Sheet1
GO	Description	p	FDR	Significant	Gene_target	Annotated	Gene_in_background	Links	Result
GO:0007156	homophilic cell adhesion via plasma membrane adhesion molecules	3.3e-08	0.000100963	81	ENSGALG00000000608|ENSGALG00000000957|ENSGALG00000001009|ENSGALG00000001450|ENSGALG00000001741|ENSGALG00000002314|ENSGALG00000002544|ENSGALG00000002553|ENSGALG00000002555|ENSGALG00000002606|ENSGALG00000002744|ENSGALG00000003285|ENSGALG00000003488|ENSGALG00000004320|ENSGALG00000004630|ENSGALG00000004653|ENSGALG00000005059|ENSGALG00000005102|ENSGALG00000005272|ENSGALG00000005278|ENSGALG00000005319|…	91	ENSGALG00000000608|ENSGALG00000000957|ENSGALG00000001009|ENSGALG00000001450|ENSGALG00000001741|ENSGALG00000002314|ENSGALG00000002544|ENSGALG00000002553|ENSGALG00000002555|ENSGALG00000002606|ENSGALG00000002744|ENSGALG00000003285|ENSGALG00000003488|ENSGALG00000004320|ENSGALG00000004630|ENSGALG00000004653|ENSGALG00000005059|ENSGALG00000005102|ENSGALG00000005272|ENSGALG00000005278|ENSGALG00000005310|…	http://amigo.geneontology.org/cgi-bin/amigo/term_details?term=GO:0007156	yes
GO:0007010	cytoskeleton organization	9e-08	0.000192311	570	ENSGALG00000000120|ENSGALG00000000123|ENSGALG00000000182|ENSGALG00000000188|ENSGALG00000000220|ENSGALG00000000227|ENSGALG00000000273|ENSGALG00000000299|ENSGALG00000000362|ENSGALG00000000368|ENSGALG00000000468|ENSGALG00000000521|ENSGALG00000000527|ENSGALG00000000550|ENSGALG00000000621|ENSGALG00000000645|ENSGALG00000000680|ENSGALG00000000681|ENSGALG00000000694|ENSGALG00000000816|ENSGALG00000000839|…	791	ENSGALG00000000098|ENSGALG00000000117|ENSGALG00000000120|ENSGALG00000000123|ENSGALG00000000182|ENSGALG00000000188|ENSGALG00000000220|ENSGALG00000000227|ENSGALG00000000273|ENSGALG00000000280|ENSGALG00000000299|ENSGALG00000000314|ENSGALG00000000362|ENSGALG00000000368|ENSGALG00000000468|ENSGALG00000000521|ENSGALG00000000527|ENSGALG00000000550|ENSGALG00000000621|ENSGALG00000000645|ENSGALG00000000680|…	http://amigo.geneontology.org/cgi-bin/amigo/term_details?term=GO:0007010	yes
GO:0048858	cell projection morphogenesis	1e-07	0.000192311	440	ENSGALG00000000059|ENSGALG00000000188|ENSGALG00000000220|ENSGALG00000000227|ENSGALG00000000247|ENSGALG00000000368|ENSGALG00000000379|ENSGALG00000000621|ENSGALG00000000644|ENSGALG00000000706|ENSGALG00000000811|ENSGALG00000000816|ENSGALG00000001076|ENSGALG00000001124|ENSGALG00000001183|ENSGALG00000001264|ENSGALG00000001288|ENSGALG00000001348|ENSGALG00000001412|ENSGALG00000001419|ENSGALG00000001446|…	600	ENSGALG00000000059|ENSGALG00000000188|ENSGALG00000000220|ENSGALG00000000227|ENSGALG00000000247|ENSGALG00000000280|ENSGALG00000000368|ENSGALG00000000379|ENSGALG00000000621|ENSGALG00000000644|ENSGALG00000000706|ENSGALG00000000784|ENSGALG00000000811|ENSGALG00000000816|ENSGALG00000000886|ENSGALG00000000898|ENSGALG00000001076|ENSGALG00000001079|ENSGALG00000001124|ENSGALG00000001129|ENSGALG00000001183|…	http://amigo.geneontology.org/cgi-bin/amigo/term_details?term=GO:0048858	yes
GO:0032990	cell part morphogenesis	3.5e-07	0.000535413	447	ENSGALG00000000059|ENSGALG00000000188|ENSGALG00000000220|ENSGALG00000000227|ENSGALG00000000247|ENSGALG00000000368|ENSGALG00000000379|ENSGALG00000000621|ENSGALG00000000644|ENSGALG00000000706|ENSGALG00000000811|ENSGALG00000000816|ENSGALG00000001076|ENSGALG00000001124|ENSGALG00000001183|ENSGALG00000001264|ENSGALG00000001288|ENSGALG00000001348|ENSGALG00000001412|ENSGALG00000001419|ENSGALG00000001446|…	614	ENSGALG00000000059|ENSGALG00000000188|ENSGALG00000000220|ENSGALG00000000227|ENSGALG00000000247|ENSGALG00000000280|ENSGALG00000000368|ENSGALG00000000379|ENSGALG00000000621|ENSGALG00000000644|ENSGALG00000000706|ENSGALG00000000784|ENSGALG00000000811|ENSGALG00000000816|ENSGALG00000000886|ENSGALG00000000898|ENSGALG00000001076|ENSGALG00000001079|ENSGALG00000001124|ENSGALG00000001129|ENSGALG00000001183|…	http://amigo.geneontology.org/cgi-bin/amigo/term_details?term=GO:0032990	yes
GO:0006928	movement of cell or subcellular component	4.4e-07	0.000575186	801	ENSGALG00000000059|ENSGALG00000000075|ENSGALG00000000120|ENSGALG00000000122|ENSGALG00000000168|ENSGALG00000000188|ENSGALG00000000208|ENSGALG00000000220|ENSGALG00000000227|ENSGALG00000000273|ENSGALG00000000362|ENSGALG00000000364|ENSGALG00000000379|ENSGALG00000000402|ENSGALG00000000468|ENSGALG00000000527|ENSGALG00000000550|ENSGALG00000000568|ENSGALG00000000621|ENSGALG00000000623|ENSGALG00000000628|…	1142	ENSGALG00000000059|ENSGALG00000000075|ENSGALG00000000120|ENSGALG00000000122|ENSGALG00000000168|ENSGALG00000000188|ENSGALG00000000208|ENSGALG00000000220|ENSGALG00000000227|ENSGALG00000000273|ENSGALG00000000277|ENSGALG00000000280|ENSGALG00000000314|ENSGALG00000000362|ENSGALG00000000364|ENSGALG00000000379|ENSGALG00000000402|ENSGALG00000000468|ENSGALG00000000527|ENSGALG00000000540|ENSGALG00000000550|…	http://amigo.geneontology.org/cgi-bin/amigo/term_details?term=GO:0006928	yes
GO:0030030	cell projection organization	1.1e-06	0.0012238	637	ENSGALG00000000059|ENSGALG00000000075|ENSGALG00000000188|ENSGALG00000000220|ENSGALG00000000221|ENSGALG00000000227|ENSGALG00000000247|ENSGALG00000000368|ENSGALG00000000379|ENSGALG00000000468|ENSGALG00000000621|ENSGALG00000000644|ENSGALG00000000645|ENSGALG00000000681|ENSGALG00000000690|ENSGALG00000000706|ENSGALG00000000733|ENSGALG00000000811|ENSGALG00000000816|ENSGALG00000000909|ENSGALG00000001076|…	900	ENSGALG00000000059|ENSGALG00000000075|ENSGALG00000000188|ENSGALG00000000220|ENSGALG00000000221|ENSGALG00000000227|ENSGALG00000000247|ENSGALG00000000280|ENSGALG00000000368|ENSGALG00000000379|ENSGALG00000000468|ENSGALG00000000621|ENSGALG00000000644|ENSGALG00000000645|ENSGALG00000000681|ENSGALG00000000690|ENSGALG00000000706|ENSGALG00000000733|ENSGALG00000000784|ENSGALG00000000811|ENSGALG00000000816|…	http://amigo.geneontology.org/cgi-bin/amigo/term_details?term=GO:0030030	yes
GO:0007399	nervous system development	1.7e-06	0.00155015	1015	ENSGALG00000000059|ENSGALG00000000067|ENSGALG00000000075|ENSGALG00000000188|ENSGALG00000000220|ENSGALG00000000227|ENSGALG00000000247|ENSGALG00000000255|ENSGALG00000000291|ENSGALG00000000360|ENSGALG00000000362|ENSGALG00000000368|ENSGALG00000000379|ENSGALG00000000394|ENSGALG00000000404|ENSGALG00000000442|ENSGALG00000000621|ENSGALG00000000644|ENSGALG00000000681|ENSGALG00000000690|ENSGALG00000000706|…	1472	ENSGALG00000000059|ENSGALG00000000067|ENSGALG00000000075|ENSGALG00000000076|ENSGALG00000000188|ENSGALG00000000220|ENSGALG00000000227|ENSGALG00000000247|ENSGALG00000000255|ENSGALG00000000277|ENSGALG00000000280|ENSGALG00000000291|ENSGALG00000000360|ENSGALG00000000362|ENSGALG00000000365|ENSGALG00000000367|ENSGALG00000000368|ENSGALG00000000379|ENSGALG00000000394|ENSGALG00000000404|ENSGALG00000000442|…	http://amigo.geneontology.org/cgi-bin/amigo/term_details?term=GO:0007399	yes
GO:0051056	regulation of small GTPase mediated signal transduction	1.8e-06	0.00155015	169	ENSGALG00000000183|ENSGALG00000000449|ENSGALG00000000464|ENSGALG00000000621|ENSGALG00000000847|ENSGALG00000000899|ENSGALG00000000906|ENSGALG00000000939|ENSGALG00000001037|ENSGALG00000001058|ENSGALG00000001085|ENSGALG00000001192|ENSGALG00000001255|ENSGALG00000001311|ENSGALG00000001419|ENSGALG00000001420|ENSGALG00000001505|ENSGALG00000001536|ENSGALG00000001828|ENSGALG00000001874|ENSGALG00000001876|…	216	ENSGALG00000000183|ENSGALG00000000449|ENSGALG00000000464|ENSGALG00000000621|ENSGALG00000000847|ENSGALG00000000899|ENSGALG00000000906|ENSGALG00000000939|ENSGALG00000000977|ENSGALG00000001037|ENSGALG00000001058|ENSGALG00000001085|ENSGALG00000001157|ENSGALG00000001192|ENSGALG00000001255|ENSGALG00000001311|ENSGALG00000001419|ENSGALG00000001420|ENSGALG00000001505|ENSGALG00000001536|ENSGALG00000001606|…	http://amigo.geneontology.org/cgi-bin/amigo/term_details?term=GO:0051056	yes
GO:0048812	neuron projection morphogenesis	1.9e-06	0.00155015	311	ENSGALG00000000059|ENSGALG00000000188|ENSGALG00000000220|ENSGALG00000000227|ENSGALG00000000247|ENSGALG00000000368|ENSGALG00000000379|ENSGALG00000000644|ENSGALG00000000811|ENSGALG00000000816|ENSGALG00000001076|ENSGALG00000001124|ENSGALG00000001183|ENSGALG00000001264|ENSGALG00000001412|ENSGALG00000001419|ENSGALG00000001475|ENSGALG00000001505|ENSGALG00000001536|ENSGALG00000001608|ENSGALG00000001727|…	420	ENSGALG00000000059|ENSGALG00000000188|ENSGALG00000000220|ENSGALG00000000227|ENSGALG00000000247|ENSGALG00000000280|ENSGALG00000000368|ENSGALG00000000379|ENSGALG00000000644|ENSGALG00000000784|ENSGALG00000000811|ENSGALG00000000816|ENSGALG00000001076|ENSGALG00000001079|ENSGALG00000001124|ENSGALG00000001129|ENSGALG00000001183|ENSGALG00000001188|ENSGALG00000001264|ENSGALG00000001270|ENSGALG00000001412|…	http://amigo.geneontology.org/cgi-bin/amigo/term_details?term=GO:0048812	yes
GO:0007169	transmembrane receptor protein tyrosine kinase signaling pathway	2.6e-06	0.00198868	346	ENSGALG00000000048|ENSGALG00000000094|ENSGALG00000000188|ENSGALG00000000206|ENSGALG00000000244|ENSGALG00000000273|ENSGALG00000000312|ENSGALG00000000379|ENSGALG00000000533|ENSGALG00000000547|ENSGALG00000000550|ENSGALG00000000621|ENSGALG00000000853|ENSGALG00000000875|ENSGALG00000000917|ENSGALG00000000950|ENSGALG00000001058|ENSGALG00000001289|ENSGALG00000001399|ENSGALG00000001419|ENSGALG00000001474|…	472	ENSGALG00000000048|ENSGALG00000000094|ENSGALG00000000188|ENSGALG00000000206|ENSGALG00000000244|ENSGALG00000000273|ENSGALG00000000280|ENSGALG00000000312|ENSGALG00000000379|ENSGALG00000000533|ENSGALG00000000535|ENSGALG00000000547|ENSGALG00000000550|ENSGALG00000000621|ENSGALG00000000736|ENSGALG00000000791|ENSGALG00000000853|ENSGALG00000000875|ENSGALG00000000917|ENSGALG00000000949|ENSGALG00000000950|…	http://amigo.geneontology.org/cgi-bin/amigo/term_details?term=GO:0007169	yes
GO:0007409	axonogenesis	3e-06	0.00215965	253	ENSGALG00000000059|ENSGALG00000000188|ENSGALG00000000220|ENSGALG00000000227|ENSGALG00000000247|ENSGALG00000000379|ENSGALG00000000644|ENSGALG00000000811|ENSGALG00000001076|ENSGALG00000001124|ENSGALG00000001183|ENSGALG00000001264|ENSGALG00000001412|ENSGALG00000001475|ENSGALG00000001536|ENSGALG00000001608|ENSGALG00000001735|ENSGALG00000001768|ENSGALG00000001772|ENSGALG00000001896|ENSGALG00000001912|…	337	ENSGALG00000000059|ENSGALG00000000188|ENSGALG00000000220|ENSGALG00000000227|ENSGALG00000000247|ENSGALG00000000280|ENSGALG00000000379|ENSGALG00000000644|ENSGALG00000000784|ENSGALG00000000811|ENSGALG00000001076|ENSGALG00000001079|ENSGALG00000001124|ENSGALG00000001183|ENSGALG00000001188|ENSGALG00000001264|ENSGALG00000001412|ENSGALG00000001475|ENSGALG00000001536|ENSGALG00000001608|ENSGALG00000001735|…	http://amigo.geneontology.org/cgi-bin/amigo/term_details?term=GO:0007409	yes
GO:0048667	cell morphogenesis involved in neuron differentiation	5.5e-06	0.00336545	298	ENSGALG00000000059|ENSGALG00000000067|ENSGALG00000000075|ENSGALG00000000188|ENSGALG00000000220|ENSGALG00000000227|ENSGALG00000000247|ENSGALG00000000379|ENSGALG00000000644|ENSGALG00000000733|ENSGALG00000000811|ENSGALG00000001076|ENSGALG00000001124|ENSGALG00000001183|ENSGALG00000001264|ENSGALG00000001412|ENSGALG00000001475|ENSGALG00000001505|ENSGALG00000001536|ENSGALG00000001608|ENSGALG00000001727|…	404	ENSGALG00000000059|ENSGALG00000000067|ENSGALG00000000075|ENSGALG00000000188|ENSGALG00000000220|ENSGALG00000000227|ENSGALG00000000247|ENSGALG00000000280|ENSGALG00000000379|ENSGALG00000000644|ENSGALG00000000733|ENSGALG00000000784|ENSGALG00000000811|ENSGALG00000000897|ENSGALG00000001076|ENSGALG00000001079|ENSGALG00000001124|ENSGALG00000001183|ENSGALG00000001188|ENSGALG00000001264|ENSGALG00000001412|…	http://amigo.geneontology.org/cgi-bin/amigo/term_details?term=GO:0048667	yes
GO:0022610	biological adhesion	6.1e-06	0.00339326	548	ENSGALG00000000075|ENSGALG00000000120|ENSGALG00000000164|ENSGALG00000000182|ENSGALG00000000220|ENSGALG00000000299|ENSGALG00000000379|ENSGALG00000000468|ENSGALG00000000569|ENSGALG00000000608|ENSGALG00000000621|ENSGALG00000000639|ENSGALG00000000644|ENSGALG00000000653|ENSGALG00000000731|ENSGALG00000000816|ENSGALG00000000921|ENSGALG00000000939|ENSGALG00000000957|ENSGALG00000001009|ENSGALG00000001020|…	774	ENSGALG00000000075|ENSGALG00000000098|ENSGALG00000000120|ENSGALG00000000164|ENSGALG00000000182|ENSGALG00000000220|ENSGALG00000000280|ENSGALG00000000299|ENSGALG00000000379|ENSGALG00000000421|ENSGALG00000000468|ENSGALG00000000569|ENSGALG00000000579|ENSGALG00000000608|ENSGALG00000000621|ENSGALG00000000630|ENSGALG00000000639|ENSGALG00000000644|ENSGALG00000000653|ENSGALG00000000731|ENSGALG00000000784|…	http://amigo.geneontology.org/cgi-bin/amigo/term_details?term=GO:0022610	yes
GO:0007155	cell adhesion	7.7e-06	0.00409707	546	ENSGALG00000000075|ENSGALG00000000120|ENSGALG00000000164|ENSGALG00000000182|ENSGALG00000000220|ENSGALG00000000299|ENSGALG00000000379|ENSGALG00000000468|ENSGALG00000000569|ENSGALG00000000608|ENSGALG00000000621|ENSGALG00000000639|ENSGALG00000000644|ENSGALG00000000653|ENSGALG00000000731|ENSGALG00000000816|ENSGALG00000000921|ENSGALG00000000939|ENSGALG00000000957|ENSGALG00000001009|ENSGALG00000001020|…	772	ENSGALG00000000075|ENSGALG00000000098|ENSGALG00000000120|ENSGALG00000000164|ENSGALG00000000182|ENSGALG00000000220|ENSGALG00000000280|ENSGALG00000000299|ENSGALG00000000379|ENSGALG00000000421|ENSGALG00000000468|ENSGALG00000000569|ENSGALG00000000579|ENSGALG00000000608|ENSGALG00000000621|ENSGALG00000000630|ENSGALG00000000639|ENSGALG00000000644|ENSGALG00000000653|ENSGALG00000000731|ENSGALG00000000784|…	http://amigo.geneontology.org/cgi-bin/amigo/term_details?term=GO:0007155	yes
GO:0040011	locomotion	1.1e-05	0.00517762	720	ENSGALG00000000059|ENSGALG00000000075|ENSGALG00000000120|ENSGALG00000000122|ENSGALG00000000168|ENSGALG00000000188|ENSGALG00000000208|ENSGALG00000000220|ENSGALG00000000227|ENSGALG00000000273|ENSGALG00000000362|ENSGALG00000000364|ENSGALG00000000379|ENSGALG00000000402|ENSGALG00000000468|ENSGALG00000000527|ENSGALG00000000550|ENSGALG00000000568|ENSGALG00000000621|ENSGALG00000000623|ENSGALG00000000644|…	1035	ENSGALG00000000059|ENSGALG00000000075|ENSGALG00000000120|ENSGALG00000000122|ENSGALG00000000168|ENSGALG00000000188|ENSGALG00000000208|ENSGALG00000000220|ENSGALG00000000227|ENSGALG00000000273|ENSGALG00000000277|ENSGALG00000000280|ENSGALG00000000362|ENSGALG00000000364|ENSGALG00000000379|ENSGALG00000000402|ENSGALG00000000424|ENSGALG00000000468|ENSGALG00000000527|ENSGALG00000000540|ENSGALG00000000550|…	http://amigo.geneontology.org/cgi-bin/amigo/term_details?term=GO:0040011	yes
GO:0000902	cell morphogenesis	1.1e-05	0.00517762	627	ENSGALG00000000059|ENSGALG00000000067|ENSGALG00000000075|ENSGALG00000000188|ENSGALG00000000220|ENSGALG00000000227|ENSGALG00000000247|ENSGALG00000000364|ENSGALG00000000368|ENSGALG00000000379|ENSGALG00000000402|ENSGALG00000000468|ENSGALG00000000569|ENSGALG00000000621|ENSGALG00000000644|ENSGALG00000000694|ENSGALG00000000706|ENSGALG00000000733|ENSGALG00000000811|ENSGALG00000000816|ENSGALG00000000920|…	895	ENSGALG00000000059|ENSGALG00000000067|ENSGALG00000000075|ENSGALG00000000098|ENSGALG00000000188|ENSGALG00000000220|ENSGALG00000000227|ENSGALG00000000247|ENSGALG00000000280|ENSGALG00000000364|ENSGALG00000000368|ENSGALG00000000379|ENSGALG00000000402|ENSGALG00000000468|ENSGALG00000000569|ENSGALG00000000579|ENSGALG00000000621|ENSGALG00000000644|ENSGALG00000000694|ENSGALG00000000706|ENSGALG00000000733|…	http://amigo.geneontology.org/cgi-bin/amigo/term_details?term=GO:0000902	yes
GO:0031175	neuron projection development	1.2e-05	0.00543911	420	ENSGALG00000000059|ENSGALG00000000188|ENSGALG00000000220|ENSGALG00000000227|ENSGALG00000000247|ENSGALG00000000368|ENSGALG00000000379|ENSGALG00000000621|ENSGALG00000000644|ENSGALG00000000681|ENSGALG00000000690|ENSGALG00000000811|ENSGALG00000000816|ENSGALG00000000909|ENSGALG00000001076|ENSGALG00000001124|ENSGALG00000001163|ENSGALG00000001183|ENSGALG00000001264|ENSGALG00000001293|ENSGALG00000001412|…	586	ENSGALG00000000059|ENSGALG00000000188|ENSGALG00000000220|ENSGALG00000000227|ENSGALG00000000247|ENSGALG00000000280|ENSGALG00000000368|ENSGALG00000000379|ENSGALG00000000621|ENSGALG00000000644|ENSGALG00000000681|ENSGALG00000000690|ENSGALG00000000784|ENSGALG00000000811|ENSGALG00000000816|ENSGALG00000000909|ENSGALG00000001076|ENSGALG00000001079|ENSGALG00000001124|ENSGALG00000001129|ENSGALG00000001163|…	http://amigo.geneontology.org/cgi-bin/amigo/term_details?term=GO:0031175	yes
GO:0032989	cellular component morphogenesis	1.5e-05	0.006119	664	ENSGALG00000000059|ENSGALG00000000067|ENSGALG00000000075|ENSGALG00000000120|ENSGALG00000000188|ENSGALG00000000220|ENSGALG00000000227|ENSGALG00000000247|ENSGALG00000000364|ENSGALG00000000368|ENSGALG00000000379|ENSGALG00000000402|ENSGALG00000000468|ENSGALG00000000569|ENSGALG00000000621|ENSGALG00000000644|ENSGALG00000000694|ENSGALG00000000706|ENSGALG00000000733|ENSGALG00000000811|ENSGALG00000000816|…	952	ENSGALG00000000059|ENSGALG00000000067|ENSGALG00000000075|ENSGALG00000000098|ENSGALG00000000120|ENSGALG00000000188|ENSGALG00000000220|ENSGALG00000000227|ENSGALG00000000247|ENSGALG00000000280|ENSGALG00000000364|ENSGALG00000000368|ENSGALG00000000379|ENSGALG00000000402|ENSGALG00000000468|ENSGALG00000000569|ENSGALG00000000579|ENSGALG00000000621|ENSGALG00000000644|ENSGALG00000000694|ENSGALG00000000706|…	http://amigo.geneontology.org/cgi-bin/amigo/term_details?term=GO:0032989	yes
GO:0048666	neuron development	1.5e-05	0.006119	490	ENSGALG00000000059|ENSGALG00000000067|ENSGALG00000000075|ENSGALG00000000188|ENSGALG00000000220|ENSGALG00000000227|ENSGALG00000000247|ENSGALG00000000368|ENSGALG00000000379|ENSGALG00000000621|ENSGALG00000000644|ENSGALG00000000681|ENSGALG00000000690|ENSGALG00000000706|ENSGALG00000000733|ENSGALG00000000811|ENSGALG00000000816|ENSGALG00000000909|ENSGALG00000000966|ENSGALG00000000972|ENSGALG00000001006|…	691	ENSGALG00000000059|ENSGALG00000000067|ENSGALG00000000075|ENSGALG00000000188|ENSGALG00000000220|ENSGALG00000000227|ENSGALG00000000247|ENSGALG00000000280|ENSGALG00000000368|ENSGALG00000000379|ENSGALG00000000621|ENSGALG00000000644|ENSGALG00000000681|ENSGALG00000000690|ENSGALG00000000706|ENSGALG00000000733|ENSGALG00000000784|ENSGALG00000000811|ENSGALG00000000816|ENSGALG00000000897|ENSGALG00000000909|…	http://amigo.geneontology.org/cgi-bin/amigo/term_details?term=GO:0048666	yes
GO:0030182	neuron differentiation	1.6e-05	0.006119	600	ENSGALG00000000059|ENSGALG00000000067|ENSGALG00000000075|ENSGALG00000000188|ENSGALG00000000220|ENSGALG00000000227|ENSGALG00000000247|ENSGALG00000000368|ENSGALG00000000379|ENSGALG00000000404|ENSGALG00000000621|ENSGALG00000000644|ENSGALG00000000681|ENSGALG00000000690|ENSGALG00000000706|ENSGALG00000000713|ENSGALG00000000733|ENSGALG00000000747|ENSGALG00000000811|ENSGALG00000000816|ENSGALG00000000839|…	856	ENSGALG00000000059|ENSGALG00000000067|ENSGALG00000000075|ENSGALG00000000076|ENSGALG00000000188|ENSGALG00000000220|ENSGALG00000000227|ENSGALG00000000247|ENSGALG00000000280|ENSGALG00000000368|ENSGALG00000000379|ENSGALG00000000404|ENSGALG00000000621|ENSGALG00000000644|ENSGALG00000000681|ENSGALG00000000690|ENSGALG00000000706|ENSGALG00000000713|ENSGALG00000000733|ENSGALG00000000747|ENSGALG00000000784|…	http://amigo.geneontology.org/cgi-bin/amigo/term_details?term=GO:0030182	yes
GO:0046578	regulation of Ras protein signal transduction	1.7e-05	0.00630442	117	ENSGALG00000000183|ENSGALG00000000449|ENSGALG00000000621|ENSGALG00000000899|ENSGALG00000000906|ENSGALG00000001037|ENSGALG00000001058|ENSGALG00000001085|ENSGALG00000001255|ENSGALG00000001419|ENSGALG00000001505|ENSGALG00000001828|ENSGALG00000001874|ENSGALG00000001876|ENSGALG00000001915|ENSGALG00000002175|ENSGALG00000002193|ENSGALG00000002453|ENSGALG00000002562|ENSGALG00000002570|ENSGALG00000002599|…	147	ENSGALG00000000183|ENSGALG00000000449|ENSGALG00000000621|ENSGALG00000000899|ENSGALG00000000906|ENSGALG00000000977|ENSGALG00000001037|ENSGALG00000001058|ENSGALG00000001085|ENSGALG00000001157|ENSGALG00000001255|ENSGALG00000001419|ENSGALG00000001505|ENSGALG00000001828|ENSGALG00000001874|ENSGALG00000001876|ENSGALG00000001894|ENSGALG00000001915|ENSGALG00000002175|ENSGALG00000002193|ENSGALG00000002453|…	http://amigo.geneontology.org/cgi-bin/amigo/term_details?term=GO:0046578	yes
GO:0061564	axon development	1.9e-05	0.00683888	262	ENSGALG00000000059|ENSGALG00000000188|ENSGALG00000000220|ENSGALG00000000227|ENSGALG00000000247|ENSGALG00000000379|ENSGALG00000000644|ENSGALG00000000811|ENSGALG00000001076|ENSGALG00000001124|ENSGALG00000001183|ENSGALG00000001264|ENSGALG00000001412|ENSGALG00000001472|ENSGALG00000001475|ENSGALG00000001536|ENSGALG00000001608|ENSGALG00000001735|ENSGALG00000001768|ENSGALG00000001772|ENSGALG00000001896|…	355	ENSGALG00000000059|ENSGALG00000000188|ENSGALG00000000220|ENSGALG00000000227|ENSGALG00000000247|ENSGALG00000000280|ENSGALG00000000379|ENSGALG00000000644|ENSGALG00000000784|ENSGALG00000000811|ENSGALG00000001076|ENSGALG00000001079|ENSGALG00000001124|ENSGALG00000001183|ENSGALG00000001188|ENSGALG00000001264|ENSGALG00000001412|ENSGALG00000001472|ENSGALG00000001475|ENSGALG00000001536|ENSGALG00000001608|…	http://amigo.geneontology.org/cgi-bin/amigo/term_details?term=GO:0061564	yes
GO:0048699	generation of neurons	2.8e-05	0.00959195	650	ENSGALG00000000059|ENSGALG00000000067|ENSGALG00000000075|ENSGALG00000000188|ENSGALG00000000220|ENSGALG00000000227|ENSGALG00000000247|ENSGALG00000000255|ENSGALG00000000362|ENSGALG00000000368|ENSGALG00000000379|ENSGALG00000000404|ENSGALG00000000621|ENSGALG00000000644|ENSGALG00000000681|ENSGALG00000000690|ENSGALG00000000706|ENSGALG00000000713|ENSGALG00000000733|ENSGALG00000000747|ENSGALG00000000811|…	934	ENSGALG00000000059|ENSGALG00000000067|ENSGALG00000000075|ENSGALG00000000076|ENSGALG00000000188|ENSGALG00000000220|ENSGALG00000000227|ENSGALG00000000247|ENSGALG00000000255|ENSGALG00000000277|ENSGALG00000000280|ENSGALG00000000362|ENSGALG00000000368|ENSGALG00000000379|ENSGALG00000000404|ENSGALG00000000621|ENSGALG00000000644|ENSGALG00000000681|ENSGALG00000000690|ENSGALG00000000706|ENSGALG00000000713|…	http://amigo.geneontology.org/cgi-bin/amigo/term_details?term=GO:0048699	yes
GO:0022008	neurogenesis	3.6e-05	0.0115939	687	ENSGALG00000000059|ENSGALG00000000067|ENSGALG00000000075|ENSGALG00000000188|ENSGALG00000000220|ENSGALG00000000227|ENSGALG00000000247|ENSGALG00000000255|ENSGALG00000000291|ENSGALG00000000362|ENSGALG00000000368|ENSGALG00000000379|ENSGALG00000000404|ENSGALG00000000621|ENSGALG00000000644|ENSGALG00000000681|ENSGALG00000000690|ENSGALG00000000706|ENSGALG00000000713|ENSGALG00000000733|ENSGALG00000000747|…	991	ENSGALG00000000059|ENSGALG00000000067|ENSGALG00000000075|ENSGALG00000000076|ENSGALG00000000188|ENSGALG00000000220|ENSGALG00000000227|ENSGALG00000000247|ENSGALG00000000255|ENSGALG00000000277|ENSGALG00000000280|ENSGALG00000000291|ENSGALG00000000362|ENSGALG00000000368|ENSGALG00000000379|ENSGALG00000000404|ENSGALG00000000621|ENSGALG00000000644|ENSGALG00000000681|ENSGALG00000000690|ENSGALG00000000706|…	http://amigo.geneontology.org/cgi-bin/amigo/term_details?term=GO:0022008	yes
GO:0035023	regulation of Rho protein signal transduction	6.7e-05	0.0210243	72	ENSGALG00000000449|ENSGALG00000000621|ENSGALG00000001037|ENSGALG00000001058|ENSGALG00000001085|ENSGALG00000001255|ENSGALG00000001505|ENSGALG00000001874|ENSGALG00000001915|ENSGALG00000002193|ENSGALG00000002453|ENSGALG00000002562|ENSGALG00000002570|ENSGALG00000002599|ENSGALG00000002699|ENSGALG00000003572|ENSGALG00000004213|ENSGALG00000004364|ENSGALG00000004621|ENSGALG00000004754|ENSGALG00000004816|…	87	ENSGALG00000000449|ENSGALG00000000621|ENSGALG00000001037|ENSGALG00000001058|ENSGALG00000001085|ENSGALG00000001255|ENSGALG00000001505|ENSGALG00000001874|ENSGALG00000001894|ENSGALG00000001915|ENSGALG00000002193|ENSGALG00000002453|ENSGALG00000002562|ENSGALG00000002570|ENSGALG00000002599|ENSGALG00000002699|ENSGALG00000003572|ENSGALG00000004213|ENSGALG00000004364|ENSGALG00000004621|ENSGALG00000004754|…	http://amigo.geneontology.org/cgi-bin/amigo/term_details?term=GO:0035023	yes
GO:0007167	enzyme linked receptor protein signaling pathway	8.6e-05	0.02567	483	ENSGALG00000000048|ENSGALG00000000094|ENSGALG00000000120|ENSGALG00000000188|ENSGALG00000000206|ENSGALG00000000244|ENSGALG00000000273|ENSGALG00000000312|ENSGALG00000000327|ENSGALG00000000379|ENSGALG00000000533|ENSGALG00000000547|ENSGALG00000000550|ENSGALG00000000621|ENSGALG00000000853|ENSGALG00000000875|ENSGALG00000000917|ENSGALG00000000950|ENSGALG00000001000|ENSGALG00000001021|ENSGALG00000001032|…	688	ENSGALG00000000048|ENSGALG00000000094|ENSGALG00000000120|ENSGALG00000000188|ENSGALG00000000206|ENSGALG00000000244|ENSGALG00000000273|ENSGALG00000000280|ENSGALG00000000312|ENSGALG00000000327|ENSGALG00000000379|ENSGALG00000000533|ENSGALG00000000535|ENSGALG00000000547|ENSGALG00000000550|ENSGALG00000000621|ENSGALG00000000736|ENSGALG00000000791|ENSGALG00000000853|ENSGALG00000000875|ENSGALG00000000917|…	http://amigo.geneontology.org/cgi-bin/amigo/term_details?term=GO:0007167	yes
GO:0043062	extracellular structure organization	9.8e-05	0.0285553	145	ENSGALG00000000120|ENSGALG00000000182|ENSGALG00000000379|ENSGALG00000000402|ENSGALG00000000909|ENSGALG00000001201|ENSGALG00000001343|ENSGALG00000001472|ENSGALG00000001527|ENSGALG00000001854|ENSGALG00000002022|ENSGALG00000002298|ENSGALG00000002375|ENSGALG00000002509|ENSGALG00000002546|ENSGALG00000002831|ENSGALG00000002909|ENSGALG00000002987|ENSGALG00000003115|ENSGALG00000003283|ENSGALG00000003398|…	190	ENSGALG00000000120|ENSGALG00000000182|ENSGALG00000000379|ENSGALG00000000402|ENSGALG00000000616|ENSGALG00000000630|ENSGALG00000000909|ENSGALG00000001007|ENSGALG00000001201|ENSGALG00000001343|ENSGALG00000001472|ENSGALG00000001527|ENSGALG00000001854|ENSGALG00000002022|ENSGALG00000002298|ENSGALG00000002375|ENSGALG00000002509|ENSGALG00000002546|ENSGALG00000002831|ENSGALG00000002909|ENSGALG00000002987|…	http://amigo.geneontology.org/cgi-bin/amigo/term_details?term=GO:0043062	yes
GO:0046039	GTP metabolic process	0.00011	0.0313065	205	ENSGALG00000000055|ENSGALG00000000122|ENSGALG00000000154|ENSGALG00000000221|ENSGALG00000000468|ENSGALG00000000527|ENSGALG00000000816|ENSGALG00000000839|ENSGALG00000000899|ENSGALG00000000906|ENSGALG00000000993|ENSGALG00000001174|ENSGALG00000001225|ENSGALG00000001419|ENSGALG00000001505|ENSGALG00000001798|ENSGALG00000001876|ENSGALG00000001915|ENSGALG00000001944|ENSGALG00000002041|ENSGALG00000002080|…	277	ENSGALG00000000055|ENSGALG00000000122|ENSGALG00000000154|ENSGALG00000000221|ENSGALG00000000280|ENSGALG00000000311|ENSGALG00000000419|ENSGALG00000000468|ENSGALG00000000527|ENSGALG00000000816|ENSGALG00000000839|ENSGALG00000000899|ENSGALG00000000906|ENSGALG00000000956|ENSGALG00000000993|ENSGALG00000001157|ENSGALG00000001174|ENSGALG00000001225|ENSGALG00000001419|ENSGALG00000001476|ENSGALG00000001503|…	http://amigo.geneontology.org/cgi-bin/amigo/term_details?term=GO:0046039	yes
GO:0030198	extracellular matrix organization	0.00012	0.0326347	144	ENSGALG00000000120|ENSGALG00000000182|ENSGALG00000000379|ENSGALG00000000402|ENSGALG00000000909|ENSGALG00000001201|ENSGALG00000001343|ENSGALG00000001472|ENSGALG00000001527|ENSGALG00000001854|ENSGALG00000002022|ENSGALG00000002298|ENSGALG00000002375|ENSGALG00000002509|ENSGALG00000002546|ENSGALG00000002831|ENSGALG00000002909|ENSGALG00000002987|ENSGALG00000003115|ENSGALG00000003283|ENSGALG00000003398|…	189	ENSGALG00000000120|ENSGALG00000000182|ENSGALG00000000379|ENSGALG00000000402|ENSGALG00000000616|ENSGALG00000000630|ENSGALG00000000909|ENSGALG00000001007|ENSGALG00000001201|ENSGALG00000001343|ENSGALG00000001472|ENSGALG00000001527|ENSGALG00000001854|ENSGALG00000002022|ENSGALG00000002298|ENSGALG00000002375|ENSGALG00000002509|ENSGALG00000002546|ENSGALG00000002831|ENSGALG00000002909|ENSGALG00000002987|…	http://amigo.geneontology.org/cgi-bin/amigo/term_details?term=GO:0030198	yes
GO:0040012	regulation of locomotion	0.00015	0.0382437	330	ENSGALG00000000120|ENSGALG00000000122|ENSGALG00000000168|ENSGALG00000000188|ENSGALG00000000208|ENSGALG00000000220|ENSGALG00000000273|ENSGALG00000000364|ENSGALG00000000379|ENSGALG00000000468|ENSGALG00000000527|ENSGALG00000000568|ENSGALG00000000621|ENSGALG00000000816|ENSGALG00000000820|ENSGALG00000000839|ENSGALG00000000850|ENSGALG00000000882|ENSGALG00000001000|ENSGALG00000001037|ENSGALG00000001085|…	462	ENSGALG00000000120|ENSGALG00000000122|ENSGALG00000000168|ENSGALG00000000188|ENSGALG00000000208|ENSGALG00000000220|ENSGALG00000000273|ENSGALG00000000277|ENSGALG00000000364|ENSGALG00000000379|ENSGALG00000000468|ENSGALG00000000527|ENSGALG00000000568|ENSGALG00000000621|ENSGALG00000000667|ENSGALG00000000785|ENSGALG00000000816|ENSGALG00000000820|ENSGALG00000000839|ENSGALG00000000850|ENSGALG00000000882|…	http://amigo.geneontology.org/cgi-bin/amigo/term_details?term=GO:0040012	yes
GO:0000226	microtubule cytoskeleton organization	0.00017	0.0424584	220	ENSGALG00000000220|ENSGALG00000000362|ENSGALG00000000468|ENSGALG00000000521|ENSGALG00000000816|ENSGALG00000000845|ENSGALG00000000878|ENSGALG00000000920|ENSGALG00000000970|ENSGALG00000001041|ENSGALG00000001163|ENSGALG00000001258|ENSGALG00000001288|ENSGALG00000001301|ENSGALG00000001475|ENSGALG00000001600|ENSGALG00000001717|ENSGALG00000001761|ENSGALG00000001775|ENSGALG00000001798|ENSGALG00000001870|…	300	ENSGALG00000000220|ENSGALG00000000280|ENSGALG00000000362|ENSGALG00000000468|ENSGALG00000000521|ENSGALG00000000816|ENSGALG00000000845|ENSGALG00000000878|ENSGALG00000000920|ENSGALG00000000970|ENSGALG00000001041|ENSGALG00000001163|ENSGALG00000001211|ENSGALG00000001258|ENSGALG00000001270|ENSGALG00000001288|ENSGALG00000001301|ENSGALG00000001475|ENSGALG00000001503|ENSGALG00000001600|ENSGALG00000001717|…	http://amigo.geneontology.org/cgi-bin/amigo/term_details?term=GO:0000226	yes
GO:1901068	guanosine-containing compound metabolic process	0.0002	0.048952	208	ENSGALG00000000055|ENSGALG00000000122|ENSGALG00000000154|ENSGALG00000000221|ENSGALG00000000468|ENSGALG00000000527|ENSGALG00000000816|ENSGALG00000000839|ENSGALG00000000899|ENSGALG00000000906|ENSGALG00000000993|ENSGALG00000001174|ENSGALG00000001225|ENSGALG00000001419|ENSGALG00000001505|ENSGALG00000001798|ENSGALG00000001876|ENSGALG00000001915|ENSGALG00000001944|ENSGALG00000002041|ENSGALG00000002080|…	283	ENSGALG00000000055|ENSGALG00000000122|ENSGALG00000000154|ENSGALG00000000221|ENSGALG00000000280|ENSGALG00000000311|ENSGALG00000000419|ENSGALG00000000468|ENSGALG00000000527|ENSGALG00000000816|ENSGALG00000000839|ENSGALG00000000899|ENSGALG00000000906|ENSGALG00000000956|ENSGALG00000000993|ENSGALG00000001157|ENSGALG00000001174|ENSGALG00000001225|ENSGALG00000001419|ENSGALG00000001476|ENSGALG00000001503|…	http://amigo.geneontology.org/cgi-bin/amigo/term_details?term=GO:1901068	yes
GO:0042995	cell projection	5.4e-09	4.7488e-06	931	ENSGALG00000000019|ENSGALG00000000048|ENSGALG00000000075|ENSGALG00000000122|ENSGALG00000000168|ENSGALG00000000188|ENSGALG00000000208|ENSGALG00000000220|ENSGALG00000000221|ENSGALG00000000273|ENSGALG00000000291|ENSGALG00000000368|ENSGALG00000000379|ENSGALG00000000400|ENSGALG00000000407|ENSGALG00000000442|ENSGALG00000000443|ENSGALG00000000527|ENSGALG00000000621|ENSGALG00000000645|ENSGALG00000000652|…	1327	ENSGALG00000000019|ENSGALG00000000048|ENSGALG00000000075|ENSGALG00000000098|ENSGALG00000000122|ENSGALG00000000168|ENSGALG00000000188|ENSGALG00000000208|ENSGALG00000000220|ENSGALG00000000221|ENSGALG00000000273|ENSGALG00000000277|ENSGALG00000000291|ENSGALG00000000314|ENSGALG00000000367|ENSGALG00000000368|ENSGALG00000000374|ENSGALG00000000379|ENSGALG00000000400|ENSGALG00000000407|ENSGALG00000000421|…	http://amigo.geneontology.org/cgi-bin/amigo/term_details?term=GO:0042995	yes
GO:0044420	extracellular matrix component	1.3e-06	0.0003816	90	ENSGALG00000000209|ENSGALG00000000327|ENSGALG00000000402|ENSGALG00000001343|ENSGALG00000001527|ENSGALG00000001544|ENSGALG00000002012|ENSGALG00000002041|ENSGALG00000002298|ENSGALG00000002509|ENSGALG00000002546|ENSGALG00000003015|ENSGALG00000003115|ENSGALG00000003164|ENSGALG00000003196|ENSGALG00000003578|ENSGALG00000003770|ENSGALG00000003852|ENSGALG00000004087|ENSGALG00000004338|ENSGALG00000004620|…	107	ENSGALG00000000209|ENSGALG00000000309|ENSGALG00000000327|ENSGALG00000000402|ENSGALG00000001343|ENSGALG00000001527|ENSGALG00000001544|ENSGALG00000002012|ENSGALG00000002041|ENSGALG00000002298|ENSGALG00000002509|ENSGALG00000002546|ENSGALG00000003015|ENSGALG00000003115|ENSGALG00000003164|ENSGALG00000003196|ENSGALG00000003578|ENSGALG00000003582|ENSGALG00000003770|ENSGALG00000003852|ENSGALG00000004087|…	http://amigo.geneontology.org/cgi-bin/amigo/term_details?term=GO:0044420	yes
GO:0005578	proteinaceous extracellular matrix	1.5e-06	0.0003816	225	ENSGALG00000000151|ENSGALG00000000182|ENSGALG00000000209|ENSGALG00000000327|ENSGALG00000000402|ENSGALG00000000548|ENSGALG00000000619|ENSGALG00000000839|ENSGALG00000001097|ENSGALG00000001201|ENSGALG00000001242|ENSGALG00000001343|ENSGALG00000001370|ENSGALG00000001527|ENSGALG00000001532|ENSGALG00000001544|ENSGALG00000001552|ENSGALG00000001559|ENSGALG00000001721|ENSGALG00000001854|ENSGALG00000001979|…	297	ENSGALG00000000151|ENSGALG00000000182|ENSGALG00000000209|ENSGALG00000000309|ENSGALG00000000327|ENSGALG00000000402|ENSGALG00000000548|ENSGALG00000000619|ENSGALG00000000839|ENSGALG00000001079|ENSGALG00000001097|ENSGALG00000001201|ENSGALG00000001242|ENSGALG00000001281|ENSGALG00000001343|ENSGALG00000001370|ENSGALG00000001407|ENSGALG00000001527|ENSGALG00000001532|ENSGALG00000001544|ENSGALG00000001552|…	http://amigo.geneontology.org/cgi-bin/amigo/term_details?term=GO:0005578	yes
GO:0030054	cell junction	1.8e-06	0.0003816	627	ENSGALG00000000075|ENSGALG00000000215|ENSGALG00000000220|ENSGALG00000000264|ENSGALG00000000273|ENSGALG00000000299|ENSGALG00000000379|ENSGALG00000000394|ENSGALG00000000442|ENSGALG00000000461|ENSGALG00000000495|ENSGALG00000000547|ENSGALG00000000608|ENSGALG00000000645|ENSGALG00000000670|ENSGALG00000000681|ENSGALG00000000748|ENSGALG00000000750|ENSGALG00000000816|ENSGALG00000000882|ENSGALG00000000899|…	893	ENSGALG00000000003|ENSGALG00000000075|ENSGALG00000000150|ENSGALG00000000215|ENSGALG00000000220|ENSGALG00000000264|ENSGALG00000000273|ENSGALG00000000299|ENSGALG00000000318|ENSGALG00000000379|ENSGALG00000000394|ENSGALG00000000421|ENSGALG00000000442|ENSGALG00000000461|ENSGALG00000000476|ENSGALG00000000495|ENSGALG00000000547|ENSGALG00000000579|ENSGALG00000000608|ENSGALG00000000613|ENSGALG00000000645|…	http://amigo.geneontology.org/cgi-bin/amigo/term_details?term=GO:0030054	yes
GO:0031012	extracellular matrix	1.8e-06	0.0003816	251	ENSGALG00000000151|ENSGALG00000000182|ENSGALG00000000209|ENSGALG00000000327|ENSGALG00000000402|ENSGALG00000000548|ENSGALG00000000619|ENSGALG00000000839|ENSGALG00000001097|ENSGALG00000001201|ENSGALG00000001242|ENSGALG00000001343|ENSGALG00000001370|ENSGALG00000001392|ENSGALG00000001527|ENSGALG00000001532|ENSGALG00000001544|ENSGALG00000001552|ENSGALG00000001559|ENSGALG00000001721|ENSGALG00000001854|…	335	ENSGALG00000000151|ENSGALG00000000182|ENSGALG00000000209|ENSGALG00000000309|ENSGALG00000000327|ENSGALG00000000377|ENSGALG00000000402|ENSGALG00000000548|ENSGALG00000000619|ENSGALG00000000839|ENSGALG00000001007|ENSGALG00000001079|ENSGALG00000001097|ENSGALG00000001201|ENSGALG00000001242|ENSGALG00000001281|ENSGALG00000001343|ENSGALG00000001370|ENSGALG00000001392|ENSGALG00000001407|ENSGALG00000001527|…	http://amigo.geneontology.org/cgi-bin/amigo/term_details?term=GO:0031012	yes
GO:0045177	apical part of cell	2.7e-06	0.00050085	190	ENSGALG00000000048|ENSGALG00000000194|ENSGALG00000000195|ENSGALG00000000221|ENSGALG00000000329|ENSGALG00000000364|ENSGALG00000000670|ENSGALG00000000733|ENSGALG00000000745|ENSGALG00000000748|ENSGALG00000000921|ENSGALG00000001177|ENSGALG00000001214|ENSGALG00000001258|ENSGALG00000001552|ENSGALG00000001559|ENSGALG00000001560|ENSGALG00000001705|ENSGALG00000001721|ENSGALG00000001727|ENSGALG00000001835|…	248	ENSGALG00000000048|ENSGALG00000000194|ENSGALG00000000195|ENSGALG00000000221|ENSGALG00000000329|ENSGALG00000000364|ENSGALG00000000579|ENSGALG00000000670|ENSGALG00000000733|ENSGALG00000000745|ENSGALG00000000748|ENSGALG00000000897|ENSGALG00000000921|ENSGALG00000001069|ENSGALG00000001177|ENSGALG00000001214|ENSGALG00000001258|ENSGALG00000001262|ENSGALG00000001270|ENSGALG00000001552|ENSGALG00000001559|…	http://amigo.geneontology.org/cgi-bin/amigo/term_details?term=GO:0045177	yes
GO:0043005	neuron projection	1.4e-05	0.00230844	459	ENSGALG00000000019|ENSGALG00000000122|ENSGALG00000000168|ENSGALG00000000220|ENSGALG00000000291|ENSGALG00000000400|ENSGALG00000000407|ENSGALG00000000442|ENSGALG00000000645|ENSGALG00000000652|ENSGALG00000000674|ENSGALG00000000681|ENSGALG00000000690|ENSGALG00000000816|ENSGALG00000000899|ENSGALG00000000912|ENSGALG00000000996|ENSGALG00000001041|ENSGALG00000001051|ENSGALG00000001067|ENSGALG00000001076|…	649	ENSGALG00000000019|ENSGALG00000000122|ENSGALG00000000168|ENSGALG00000000220|ENSGALG00000000277|ENSGALG00000000291|ENSGALG00000000314|ENSGALG00000000367|ENSGALG00000000374|ENSGALG00000000400|ENSGALG00000000407|ENSGALG00000000421|ENSGALG00000000442|ENSGALG00000000447|ENSGALG00000000579|ENSGALG00000000625|ENSGALG00000000645|ENSGALG00000000652|ENSGALG00000000674|ENSGALG00000000681|ENSGALG00000000690|…	http://amigo.geneontology.org/cgi-bin/amigo/term_details?term=GO:0043005	yes
GO:0044463	cell projection part	2.1e-05	0.0031164	458	ENSGALG00000000019|ENSGALG00000000168|ENSGALG00000000220|ENSGALG00000000221|ENSGALG00000000379|ENSGALG00000000400|ENSGALG00000000442|ENSGALG00000000621|ENSGALG00000000645|ENSGALG00000000674|ENSGALG00000000681|ENSGALG00000000690|ENSGALG00000000706|ENSGALG00000000733|ENSGALG00000000816|ENSGALG00000000875|ENSGALG00000000966|ENSGALG00000000996|ENSGALG00000001026|ENSGALG00000001076|ENSGALG00000001111|…	649	ENSGALG00000000019|ENSGALG00000000098|ENSGALG00000000168|ENSGALG00000000220|ENSGALG00000000221|ENSGALG00000000367|ENSGALG00000000379|ENSGALG00000000400|ENSGALG00000000442|ENSGALG00000000621|ENSGALG00000000645|ENSGALG00000000674|ENSGALG00000000681|ENSGALG00000000690|ENSGALG00000000706|ENSGALG00000000733|ENSGALG00000000784|ENSGALG00000000816|ENSGALG00000000875|ENSGALG00000000898|ENSGALG00000000966|…	http://amigo.geneontology.org/cgi-bin/amigo/term_details?term=GO:0044463	yes
GO:0005604	basement membrane	2.8e-05	0.00377745	71	ENSGALG00000000209|ENSGALG00000000402|ENSGALG00000001343|ENSGALG00000001527|ENSGALG00000002012|ENSGALG00000002041|ENSGALG00000002298|ENSGALG00000002546|ENSGALG00000003015|ENSGALG00000003115|ENSGALG00000003196|ENSGALG00000003578|ENSGALG00000003770|ENSGALG00000003852|ENSGALG00000004338|ENSGALG00000004620|ENSGALG00000004627|ENSGALG00000004946|ENSGALG00000004960|ENSGALG00000005141|ENSGALG00000005321|…	85	ENSGALG00000000209|ENSGALG00000000309|ENSGALG00000000402|ENSGALG00000001343|ENSGALG00000001527|ENSGALG00000002012|ENSGALG00000002041|ENSGALG00000002298|ENSGALG00000002546|ENSGALG00000003015|ENSGALG00000003115|ENSGALG00000003196|ENSGALG00000003578|ENSGALG00000003770|ENSGALG00000003852|ENSGALG00000004184|ENSGALG00000004338|ENSGALG00000004620|ENSGALG00000004627|ENSGALG00000004946|ENSGALG00000004960|…	http://amigo.geneontology.org/cgi-bin/amigo/term_details?term=GO:0005604	yes
GO:0005856	cytoskeleton	3.8e-05	0.00469933	1132	ENSGALG00000000041|ENSGALG00000000059|ENSGALG00000000106|ENSGALG00000000122|ENSGALG00000000164|ENSGALG00000000188|ENSGALG00000000220|ENSGALG00000000230|ENSGALG00000000234|ENSGALG00000000264|ENSGALG00000000273|ENSGALG00000000316|ENSGALG00000000317|ENSGALG00000000362|ENSGALG00000000368|ENSGALG00000000410|ENSGALG00000000433|ENSGALG00000000443|ENSGALG00000000468|ENSGALG00000000470|ENSGALG00000000495|…	1680	ENSGALG00000000041|ENSGALG00000000059|ENSGALG00000000106|ENSGALG00000000122|ENSGALG00000000164|ENSGALG00000000169|ENSGALG00000000188|ENSGALG00000000220|ENSGALG00000000230|ENSGALG00000000234|ENSGALG00000000264|ENSGALG00000000273|ENSGALG00000000302|ENSGALG00000000313|ENSGALG00000000314|ENSGALG00000000316|ENSGALG00000000317|ENSGALG00000000318|ENSGALG00000000362|ENSGALG00000000366|ENSGALG00000000368|…	http://amigo.geneontology.org/cgi-bin/amigo/term_details?term=GO:0005856	yes
GO:0097458	neuron part	4.8e-05	0.005406	565	ENSGALG00000000019|ENSGALG00000000122|ENSGALG00000000168|ENSGALG00000000217|ENSGALG00000000220|ENSGALG00000000291|ENSGALG00000000360|ENSGALG00000000400|ENSGALG00000000407|ENSGALG00000000442|ENSGALG00000000645|ENSGALG00000000652|ENSGALG00000000674|ENSGALG00000000681|ENSGALG00000000690|ENSGALG00000000733|ENSGALG00000000816|ENSGALG00000000875|ENSGALG00000000899|ENSGALG00000000912|ENSGALG00000000996|…	814	ENSGALG00000000019|ENSGALG00000000122|ENSGALG00000000168|ENSGALG00000000217|ENSGALG00000000220|ENSGALG00000000277|ENSGALG00000000291|ENSGALG00000000314|ENSGALG00000000360|ENSGALG00000000367|ENSGALG00000000374|ENSGALG00000000400|ENSGALG00000000407|ENSGALG00000000421|ENSGALG00000000442|ENSGALG00000000447|ENSGALG00000000579|ENSGALG00000000625|ENSGALG00000000645|ENSGALG00000000652|ENSGALG00000000674|…	http://amigo.geneontology.org/cgi-bin/amigo/term_details?term=GO:0097458	yes
GO:0005911	cell-cell junction	5.1e-05	0.005406	208	ENSGALG00000000075|ENSGALG00000000220|ENSGALG00000000299|ENSGALG00000000547|ENSGALG00000000681|ENSGALG00000000748|ENSGALG00000000882|ENSGALG00000000920|ENSGALG00000000921|ENSGALG00000000957|ENSGALG00000000966|ENSGALG00000001020|ENSGALG00000001214|ENSGALG00000001472|ENSGALG00000001486|ENSGALG00000001768|ENSGALG00000001816|ENSGALG00000001840|ENSGALG00000002022|ENSGALG00000002108|ENSGALG00000002113|…	281	ENSGALG00000000003|ENSGALG00000000075|ENSGALG00000000220|ENSGALG00000000299|ENSGALG00000000421|ENSGALG00000000547|ENSGALG00000000681|ENSGALG00000000748|ENSGALG00000000882|ENSGALG00000000920|ENSGALG00000000921|ENSGALG00000000957|ENSGALG00000000966|ENSGALG00000000997|ENSGALG00000001020|ENSGALG00000001214|ENSGALG00000001262|ENSGALG00000001270|ENSGALG00000001472|ENSGALG00000001486|ENSGALG00000001503|…	http://amigo.geneontology.org/cgi-bin/amigo/term_details?term=GO:0005911	yes
GO:0016324	apical plasma membrane	6e-05	0.005936	147	ENSGALG00000000048|ENSGALG00000000194|ENSGALG00000000195|ENSGALG00000000221|ENSGALG00000000329|ENSGALG00000000364|ENSGALG00000000670|ENSGALG00000000733|ENSGALG00000000745|ENSGALG00000000748|ENSGALG00000000921|ENSGALG00000001177|ENSGALG00000001560|ENSGALG00000001705|ENSGALG00000001727|ENSGALG00000001835|ENSGALG00000001840|ENSGALG00000001936|ENSGALG00000002287|ENSGALG00000002435|ENSGALG00000002466|…	193	ENSGALG00000000048|ENSGALG00000000194|ENSGALG00000000195|ENSGALG00000000221|ENSGALG00000000329|ENSGALG00000000364|ENSGALG00000000579|ENSGALG00000000670|ENSGALG00000000733|ENSGALG00000000745|ENSGALG00000000748|ENSGALG00000000897|ENSGALG00000000921|ENSGALG00000001069|ENSGALG00000001177|ENSGALG00000001270|ENSGALG00000001560|ENSGALG00000001705|ENSGALG00000001727|ENSGALG00000001835|ENSGALG00000001840|…	http://amigo.geneontology.org/cgi-bin/amigo/term_details?term=GO:0016324	yes
GO:0031252	cell leading edge	7.9e-05	0.00732725	214	ENSGALG00000000019|ENSGALG00000000075|ENSGALG00000000188|ENSGALG00000000208|ENSGALG00000000220|ENSGALG00000000368|ENSGALG00000000379|ENSGALG00000000442|ENSGALG00000000527|ENSGALG00000000621|ENSGALG00000000674|ENSGALG00000000681|ENSGALG00000000816|ENSGALG00000000824|ENSGALG00000000921|ENSGALG00000001183|ENSGALG00000001214|ENSGALG00000001287|ENSGALG00000001293|ENSGALG00000001311|ENSGALG00000001712|…	291	ENSGALG00000000019|ENSGALG00000000075|ENSGALG00000000098|ENSGALG00000000188|ENSGALG00000000208|ENSGALG00000000220|ENSGALG00000000318|ENSGALG00000000368|ENSGALG00000000379|ENSGALG00000000442|ENSGALG00000000527|ENSGALG00000000621|ENSGALG00000000674|ENSGALG00000000681|ENSGALG00000000784|ENSGALG00000000816|ENSGALG00000000824|ENSGALG00000000921|ENSGALG00000001077|ENSGALG00000001183|ENSGALG00000001214|…	http://amigo.geneontology.org/cgi-bin/amigo/term_details?term=GO:0031252	yes
GO:0030424	axon	0.00011	0.00960235	197	ENSGALG00000000019|ENSGALG00000000220|ENSGALG00000000291|ENSGALG00000000400|ENSGALG00000000407|ENSGALG00000000442|ENSGALG00000000674|ENSGALG00000000681|ENSGALG00000000690|ENSGALG00000000912|ENSGALG00000000996|ENSGALG00000001041|ENSGALG00000001051|ENSGALG00000001067|ENSGALG00000001183|ENSGALG00000001419|ENSGALG00000001560|ENSGALG00000001688|ENSGALG00000001706|ENSGALG00000001764|ENSGALG00000001772|…	267	ENSGALG00000000019|ENSGALG00000000220|ENSGALG00000000277|ENSGALG00000000291|ENSGALG00000000314|ENSGALG00000000400|ENSGALG00000000407|ENSGALG00000000421|ENSGALG00000000442|ENSGALG00000000447|ENSGALG00000000625|ENSGALG00000000674|ENSGALG00000000681|ENSGALG00000000690|ENSGALG00000000912|ENSGALG00000000996|ENSGALG00000001041|ENSGALG00000001051|ENSGALG00000001067|ENSGALG00000001129|ENSGALG00000001183|…	http://amigo.geneontology.org/cgi-bin/amigo/term_details?term=GO:0030424	yes
GO:0014069	postsynaptic density	0.00013	0.0107178	113	ENSGALG00000000264|ENSGALG00000000681|ENSGALG00000000816|ENSGALG00000001026|ENSGALG00000001192|ENSGALG00000001727|ENSGALG00000001849|ENSGALG00000002150|ENSGALG00000002199|ENSGALG00000002526|ENSGALG00000002606|ENSGALG00000002789|ENSGALG00000003074|ENSGALG00000003113|ENSGALG00000003164|ENSGALG00000003901|ENSGALG00000003911|ENSGALG00000004021|ENSGALG00000004071|ENSGALG00000004083|ENSGALG00000004212|…	146	ENSGALG00000000264|ENSGALG00000000681|ENSGALG00000000816|ENSGALG00000001026|ENSGALG00000001192|ENSGALG00000001727|ENSGALG00000001849|ENSGALG00000002150|ENSGALG00000002199|ENSGALG00000002526|ENSGALG00000002606|ENSGALG00000002789|ENSGALG00000003074|ENSGALG00000003113|ENSGALG00000003164|ENSGALG00000003901|ENSGALG00000003911|ENSGALG00000003921|ENSGALG00000004021|ENSGALG00000004064|ENSGALG00000004071|…	http://amigo.geneontology.org/cgi-bin/amigo/term_details?term=GO:0014069	yes
GO:0030027	lamellipodium	0.00014	0.0109347	122	ENSGALG00000000075|ENSGALG00000000188|ENSGALG00000000208|ENSGALG00000000220|ENSGALG00000000379|ENSGALG00000000442|ENSGALG00000000527|ENSGALG00000000816|ENSGALG00000000824|ENSGALG00000000921|ENSGALG00000001183|ENSGALG00000001287|ENSGALG00000001293|ENSGALG00000002189|ENSGALG00000002447|ENSGALG00000002562|ENSGALG00000002678|ENSGALG00000002750|ENSGALG00000002790|ENSGALG00000002845|ENSGALG00000002871|…	159	ENSGALG00000000075|ENSGALG00000000098|ENSGALG00000000188|ENSGALG00000000208|ENSGALG00000000220|ENSGALG00000000379|ENSGALG00000000442|ENSGALG00000000527|ENSGALG00000000816|ENSGALG00000000824|ENSGALG00000000921|ENSGALG00000001183|ENSGALG00000001287|ENSGALG00000001293|ENSGALG00000001894|ENSGALG00000002189|ENSGALG00000002367|ENSGALG00000002447|ENSGALG00000002536|ENSGALG00000002562|ENSGALG00000002678|…	http://amigo.geneontology.org/cgi-bin/amigo/term_details?term=GO:0030027	yes
GO:0098590	plasma membrane region	0.00019	0.014098	238	ENSGALG00000000048|ENSGALG00000000075|ENSGALG00000000194|ENSGALG00000000195|ENSGALG00000000221|ENSGALG00000000329|ENSGALG00000000364|ENSGALG00000000670|ENSGALG00000000674|ENSGALG00000000733|ENSGALG00000000745|ENSGALG00000000748|ENSGALG00000000875|ENSGALG00000000921|ENSGALG00000001045|ENSGALG00000001051|ENSGALG00000001177|ENSGALG00000001331|ENSGALG00000001560|ENSGALG00000001661|ENSGALG00000001705|…	329	ENSGALG00000000048|ENSGALG00000000075|ENSGALG00000000194|ENSGALG00000000195|ENSGALG00000000221|ENSGALG00000000329|ENSGALG00000000364|ENSGALG00000000579|ENSGALG00000000670|ENSGALG00000000674|ENSGALG00000000733|ENSGALG00000000745|ENSGALG00000000748|ENSGALG00000000860|ENSGALG00000000875|ENSGALG00000000897|ENSGALG00000000921|ENSGALG00000001045|ENSGALG00000001051|ENSGALG00000001069|ENSGALG00000001177|…	http://amigo.geneontology.org/cgi-bin/amigo/term_details?term=GO:0098590	yes
GO:0005581	collagen trimer	0.00029	0.0187113	60	ENSGALG00000002043|ENSGALG00000002298|ENSGALG00000002509|ENSGALG00000002546|ENSGALG00000002552|ENSGALG00000003115|ENSGALG00000003923|ENSGALG00000004286|ENSGALG00000004338|ENSGALG00000004481|ENSGALG00000004771|ENSGALG00000004946|ENSGALG00000005180|ENSGALG00000005554|ENSGALG00000005628|ENSGALG00000005797|ENSGALG00000005811|ENSGALG00000005974|ENSGALG00000006126|ENSGALG00000006708|ENSGALG00000006758|…	73	ENSGALG00000002043|ENSGALG00000002298|ENSGALG00000002496|ENSGALG00000002503|ENSGALG00000002507|ENSGALG00000002509|ENSGALG00000002546|ENSGALG00000002552|ENSGALG00000003115|ENSGALG00000003923|ENSGALG00000004286|ENSGALG00000004338|ENSGALG00000004481|ENSGALG00000004771|ENSGALG00000004946|ENSGALG00000005180|ENSGALG00000005253|ENSGALG00000005554|ENSGALG00000005628|ENSGALG00000005797|ENSGALG00000005811|…	http://amigo.geneontology.org/cgi-bin/amigo/term_details?term=GO:0005581	yes
GO:0005871	kinesin complex	0.00029	0.0187113	40	ENSGALG00000000628|ENSGALG00000000878|ENSGALG00000001020|ENSGALG00000001163|ENSGALG00000002175|ENSGALG00000002726|ENSGALG00000003007|ENSGALG00000003231|ENSGALG00000004195|ENSGALG00000004502|ENSGALG00000005517|ENSGALG00000005806|ENSGALG00000006221|ENSGALG00000006604|ENSGALG00000006611|ENSGALG00000006790|ENSGALG00000006860|ENSGALG00000007098|ENSGALG00000007215|ENSGALG00000008095|ENSGALG00000008725|…	46	ENSGALG00000000628|ENSGALG00000000878|ENSGALG00000001020|ENSGALG00000001163|ENSGALG00000002175|ENSGALG00000002726|ENSGALG00000003007|ENSGALG00000003231|ENSGALG00000003571|ENSGALG00000004195|ENSGALG00000004502|ENSGALG00000005517|ENSGALG00000005806|ENSGALG00000006221|ENSGALG00000006500|ENSGALG00000006604|ENSGALG00000006611|ENSGALG00000006790|ENSGALG00000006860|ENSGALG00000007098|ENSGALG00000007215|…	http://amigo.geneontology.org/cgi-bin/amigo/term_details?term=GO:0005871	yes
GO:0005874	microtubule	0.00032	0.0197867	222	ENSGALG00000000059|ENSGALG00000000220|ENSGALG00000000362|ENSGALG00000000433|ENSGALG00000000468|ENSGALG00000000596|ENSGALG00000000628|ENSGALG00000000634|ENSGALG00000000834|ENSGALG00000000878|ENSGALG00000000895|ENSGALG00000001020|ENSGALG00000001041|ENSGALG00000001111|ENSGALG00000001163|ENSGALG00000001258|ENSGALG00000001348|ENSGALG00000001475|ENSGALG00000001656|ENSGALG00000001692|ENSGALG00000001761|…	307	ENSGALG00000000059|ENSGALG00000000220|ENSGALG00000000362|ENSGALG00000000433|ENSGALG00000000468|ENSGALG00000000540|ENSGALG00000000596|ENSGALG00000000625|ENSGALG00000000628|ENSGALG00000000634|ENSGALG00000000834|ENSGALG00000000878|ENSGALG00000000895|ENSGALG00000000898|ENSGALG00000001020|ENSGALG00000001041|ENSGALG00000001111|ENSGALG00000001163|ENSGALG00000001204|ENSGALG00000001258|ENSGALG00000001291|…	http://amigo.geneontology.org/cgi-bin/amigo/term_details?term=GO:0005874	yes
GO:0030425	dendrite	0.00038	0.0219852	227	ENSGALG00000000122|ENSGALG00000000168|ENSGALG00000000442|ENSGALG00000000645|ENSGALG00000000674|ENSGALG00000000681|ENSGALG00000000816|ENSGALG00000000899|ENSGALG00000001183|ENSGALG00000001192|ENSGALG00000001258|ENSGALG00000001311|ENSGALG00000001419|ENSGALG00000001450|ENSGALG00000001512|ENSGALG00000001727|ENSGALG00000001768|ENSGALG00000001772|ENSGALG00000001812|ENSGALG00000001846|ENSGALG00000001849|…	315	ENSGALG00000000122|ENSGALG00000000168|ENSGALG00000000367|ENSGALG00000000442|ENSGALG00000000645|ENSGALG00000000674|ENSGALG00000000681|ENSGALG00000000816|ENSGALG00000000899|ENSGALG00000001129|ENSGALG00000001157|ENSGALG00000001172|ENSGALG00000001183|ENSGALG00000001192|ENSGALG00000001258|ENSGALG00000001311|ENSGALG00000001419|ENSGALG00000001450|ENSGALG00000001512|ENSGALG00000001614|ENSGALG00000001727|…	http://amigo.geneontology.org/cgi-bin/amigo/term_details?term=GO:0030425	yes
GO:0005913	cell-cell adherens junction	0.00039	0.0219852	36	ENSGALG00000000075|ENSGALG00000001020|ENSGALG00000002447|ENSGALG00000002845|ENSGALG00000003138|ENSGALG00000003628|ENSGALG00000003970|ENSGALG00000004260|ENSGALG00000004320|ENSGALG00000004973|ENSGALG00000005079|ENSGALG00000005359|ENSGALG00000006090|ENSGALG00000006527|ENSGALG00000007125|ENSGALG00000008714|ENSGALG00000008914|ENSGALG00000011329|ENSGALG00000011905|ENSGALG00000012790|ENSGALG00000013902|…	41	ENSGALG00000000075|ENSGALG00000001020|ENSGALG00000002447|ENSGALG00000002845|ENSGALG00000003138|ENSGALG00000003628|ENSGALG00000003970|ENSGALG00000004000|ENSGALG00000004260|ENSGALG00000004320|ENSGALG00000004973|ENSGALG00000005079|ENSGALG00000005359|ENSGALG00000006090|ENSGALG00000006527|ENSGALG00000006742|ENSGALG00000007125|ENSGALG00000008714|ENSGALG00000008914|ENSGALG00000009474|ENSGALG00000011329|…	http://amigo.geneontology.org/cgi-bin/amigo/term_details?term=GO:0005913	yes
GO:0044456	synapse part	0.0004	0.0219852	284	ENSGALG00000000019|ENSGALG00000000209|ENSGALG00000000217|ENSGALG00000000264|ENSGALG00000000394|ENSGALG00000000442|ENSGALG00000000681|ENSGALG00000000816|ENSGALG00000000853|ENSGALG00000000996|ENSGALG00000001024|ENSGALG00000001026|ENSGALG00000001192|ENSGALG00000001282|ENSGALG00000001560|ENSGALG00000001573|ENSGALG00000001688|ENSGALG00000001690|ENSGALG00000001695|ENSGALG00000001698|ENSGALG00000001706|…	400	ENSGALG00000000019|ENSGALG00000000209|ENSGALG00000000217|ENSGALG00000000264|ENSGALG00000000394|ENSGALG00000000442|ENSGALG00000000476|ENSGALG00000000579|ENSGALG00000000613|ENSGALG00000000681|ENSGALG00000000816|ENSGALG00000000853|ENSGALG00000000996|ENSGALG00000001024|ENSGALG00000001026|ENSGALG00000001157|ENSGALG00000001172|ENSGALG00000001192|ENSGALG00000001282|ENSGALG00000001560|ENSGALG00000001573|…	http://amigo.geneontology.org/cgi-bin/amigo/term_details?term=GO:0044456	yes
GO:0044459	plasma membrane part	0.00053	0.02809	1137	ENSGALG00000000019|ENSGALG00000000048|ENSGALG00000000075|ENSGALG00000000080|ENSGALG00000000094|ENSGALG00000000122|ENSGALG00000000123|ENSGALG00000000162|ENSGALG00000000178|ENSGALG00000000194|ENSGALG00000000195|ENSGALG00000000199|ENSGALG00000000220|ENSGALG00000000221|ENSGALG00000000251|ENSGALG00000000252|ENSGALG00000000264|ENSGALG00000000329|ENSGALG00000000364|ENSGALG00000000371|ENSGALG00000000379|…	1707	ENSGALG00000000019|ENSGALG00000000048|ENSGALG00000000075|ENSGALG00000000080|ENSGALG00000000094|ENSGALG00000000098|ENSGALG00000000117|ENSGALG00000000122|ENSGALG00000000123|ENSGALG00000000141|ENSGALG00000000158|ENSGALG00000000162|ENSGALG00000000166|ENSGALG00000000178|ENSGALG00000000194|ENSGALG00000000195|ENSGALG00000000199|ENSGALG00000000220|ENSGALG00000000221|ENSGALG00000000251|ENSGALG00000000252|…	http://amigo.geneontology.org/cgi-bin/amigo/term_details?term=GO:0044459	yes
GO:0045202	synapse	0.00069	0.035309	365	ENSGALG00000000019|ENSGALG00000000168|ENSGALG00000000209|ENSGALG00000000217|ENSGALG00000000264|ENSGALG00000000394|ENSGALG00000000400|ENSGALG00000000442|ENSGALG00000000681|ENSGALG00000000733|ENSGALG00000000816|ENSGALG00000000853|ENSGALG00000000912|ENSGALG00000000966|ENSGALG00000000996|ENSGALG00000001024|ENSGALG00000001026|ENSGALG00000001150|ENSGALG00000001192|ENSGALG00000001282|ENSGALG00000001311|…	524	ENSGALG00000000019|ENSGALG00000000168|ENSGALG00000000209|ENSGALG00000000217|ENSGALG00000000264|ENSGALG00000000367|ENSGALG00000000394|ENSGALG00000000400|ENSGALG00000000442|ENSGALG00000000476|ENSGALG00000000579|ENSGALG00000000613|ENSGALG00000000681|ENSGALG00000000733|ENSGALG00000000816|ENSGALG00000000853|ENSGALG00000000912|ENSGALG00000000966|ENSGALG00000000996|ENSGALG00000001024|ENSGALG00000001026|…	http://amigo.geneontology.org/cgi-bin/amigo/term_details?term=GO:0045202	yes
GO:0070161	anchoring junction	0.00094	0.0464987	237	ENSGALG00000000075|ENSGALG00000000220|ENSGALG00000000299|ENSGALG00000000379|ENSGALG00000000461|ENSGALG00000000608|ENSGALG00000000681|ENSGALG00000000750|ENSGALG00000000921|ENSGALG00000000957|ENSGALG00000001000|ENSGALG00000001014|ENSGALG00000001020|ENSGALG00000001076|ENSGALG00000001301|ENSGALG00000001381|ENSGALG00000001386|ENSGALG00000001472|ENSGALG00000001516|ENSGALG00000001634|ENSGALG00000001840|…	333	ENSGALG00000000075|ENSGALG00000000150|ENSGALG00000000220|ENSGALG00000000299|ENSGALG00000000318|ENSGALG00000000379|ENSGALG00000000461|ENSGALG00000000608|ENSGALG00000000681|ENSGALG00000000750|ENSGALG00000000784|ENSGALG00000000921|ENSGALG00000000957|ENSGALG00000001000|ENSGALG00000001014|ENSGALG00000001020|ENSGALG00000001076|ENSGALG00000001301|ENSGALG00000001328|ENSGALG00000001381|ENSGALG00000001386|…	http://amigo.geneontology.org/cgi-bin/amigo/term_details?term=GO:0070161	yes
GO:0032559	adenyl ribonucleotide binding	3.4e-16	3.80205e-13	982	ENSGALG00000000019|ENSGALG00000000048|ENSGALG00000000181|ENSGALG00000000189|ENSGALG00000000244|ENSGALG00000000273|ENSGALG00000000312|ENSGALG00000000349|ENSGALG00000000352|ENSGALG00000000386|ENSGALG00000000410|ENSGALG00000000463|ENSGALG00000000490|ENSGALG00000000525|ENSGALG00000000550|ENSGALG00000000623|ENSGALG00000000628|ENSGALG00000000670|ENSGALG00000000674|ENSGALG00000000675|ENSGALG00000000680|…	1347	ENSGALG00000000004|ENSGALG00000000019|ENSGALG00000000048|ENSGALG00000000076|ENSGALG00000000102|ENSGALG00000000181|ENSGALG00000000189|ENSGALG00000000244|ENSGALG00000000273|ENSGALG00000000312|ENSGALG00000000349|ENSGALG00000000352|ENSGALG00000000366|ENSGALG00000000386|ENSGALG00000000410|ENSGALG00000000463|ENSGALG00000000466|ENSGALG00000000490|ENSGALG00000000523|ENSGALG00000000525|ENSGALG00000000550|…	http://amigo.geneontology.org/cgi-bin/amigo/term_details?term=GO:0032559	yes
GO:0005524	ATP binding	3.6e-16	3.80205e-13	963	ENSGALG00000000019|ENSGALG00000000048|ENSGALG00000000181|ENSGALG00000000189|ENSGALG00000000244|ENSGALG00000000273|ENSGALG00000000312|ENSGALG00000000349|ENSGALG00000000352|ENSGALG00000000386|ENSGALG00000000410|ENSGALG00000000463|ENSGALG00000000490|ENSGALG00000000525|ENSGALG00000000550|ENSGALG00000000623|ENSGALG00000000628|ENSGALG00000000670|ENSGALG00000000674|ENSGALG00000000675|ENSGALG00000000680|…	1319	ENSGALG00000000004|ENSGALG00000000019|ENSGALG00000000048|ENSGALG00000000076|ENSGALG00000000102|ENSGALG00000000181|ENSGALG00000000189|ENSGALG00000000244|ENSGALG00000000273|ENSGALG00000000312|ENSGALG00000000349|ENSGALG00000000352|ENSGALG00000000366|ENSGALG00000000386|ENSGALG00000000410|ENSGALG00000000463|ENSGALG00000000466|ENSGALG00000000490|ENSGALG00000000523|ENSGALG00000000525|ENSGALG00000000550|…	http://amigo.geneontology.org/cgi-bin/amigo/term_details?term=GO:0005524	yes
GO:0030554	adenyl nucleotide binding	4.2e-16	3.80205e-13	985	ENSGALG00000000019|ENSGALG00000000048|ENSGALG00000000181|ENSGALG00000000189|ENSGALG00000000244|ENSGALG00000000273|ENSGALG00000000312|ENSGALG00000000349|ENSGALG00000000352|ENSGALG00000000386|ENSGALG00000000410|ENSGALG00000000463|ENSGALG00000000490|ENSGALG00000000525|ENSGALG00000000550|ENSGALG00000000623|ENSGALG00000000628|ENSGALG00000000670|ENSGALG00000000674|ENSGALG00000000675|ENSGALG00000000680|…	1352	ENSGALG00000000004|ENSGALG00000000019|ENSGALG00000000048|ENSGALG00000000076|ENSGALG00000000102|ENSGALG00000000181|ENSGALG00000000189|ENSGALG00000000244|ENSGALG00000000273|ENSGALG00000000312|ENSGALG00000000349|ENSGALG00000000352|ENSGALG00000000366|ENSGALG00000000386|ENSGALG00000000410|ENSGALG00000000463|ENSGALG00000000466|ENSGALG00000000490|ENSGALG00000000523|ENSGALG00000000525|ENSGALG00000000550|…	http://amigo.geneontology.org/cgi-bin/amigo/term_details?term=GO:0030554	yes
GO:0016887	ATPase activity	3.1e-11	2.24502e-08	255	ENSGALG00000000048|ENSGALG00000000181|ENSGALG00000000189|ENSGALG00000000349|ENSGALG00000000386|ENSGALG00000000463|ENSGALG00000000490|ENSGALG00000000628|ENSGALG00000000674|ENSGALG00000000733|ENSGALG00000000747|ENSGALG00000000787|ENSGALG00000001020|ENSGALG00000001041|ENSGALG00000001084|ENSGALG00000001111|ENSGALG00000001183|ENSGALG00000001186|ENSGALG00000001226|ENSGALG00000001452|ENSGALG00000001504|…	319	ENSGALG00000000048|ENSGALG00000000181|ENSGALG00000000189|ENSGALG00000000349|ENSGALG00000000386|ENSGALG00000000463|ENSGALG00000000490|ENSGALG00000000628|ENSGALG00000000674|ENSGALG00000000733|ENSGALG00000000747|ENSGALG00000000787|ENSGALG00000001020|ENSGALG00000001041|ENSGALG00000001084|ENSGALG00000001111|ENSGALG00000001183|ENSGALG00000001186|ENSGALG00000001226|ENSGALG00000001452|ENSGALG00000001504|…	http://amigo.geneontology.org/cgi-bin/amigo/term_details?term=GO:0016887	yes
GO:0001882	nucleoside binding	8.9e-10	4.60384e-07	1127	ENSGALG00000000019|ENSGALG00000000041|ENSGALG00000000048|ENSGALG00000000059|ENSGALG00000000181|ENSGALG00000000189|ENSGALG00000000244|ENSGALG00000000273|ENSGALG00000000312|ENSGALG00000000349|ENSGALG00000000352|ENSGALG00000000386|ENSGALG00000000410|ENSGALG00000000433|ENSGALG00000000463|ENSGALG00000000464|ENSGALG00000000490|ENSGALG00000000525|ENSGALG00000000550|ENSGALG00000000623|ENSGALG00000000628|…	1616	ENSGALG00000000004|ENSGALG00000000019|ENSGALG00000000041|ENSGALG00000000048|ENSGALG00000000059|ENSGALG00000000076|ENSGALG00000000102|ENSGALG00000000181|ENSGALG00000000189|ENSGALG00000000244|ENSGALG00000000273|ENSGALG00000000312|ENSGALG00000000349|ENSGALG00000000352|ENSGALG00000000366|ENSGALG00000000386|ENSGALG00000000410|ENSGALG00000000433|ENSGALG00000000463|ENSGALG00000000464|ENSGALG00000000466|…	http://amigo.geneontology.org/cgi-bin/amigo/term_details?term=GO:0001882	yes
GO:0032549	ribonucleoside binding	1.3e-09	5.88412e-07	1122	ENSGALG00000000019|ENSGALG00000000041|ENSGALG00000000048|ENSGALG00000000059|ENSGALG00000000181|ENSGALG00000000189|ENSGALG00000000244|ENSGALG00000000273|ENSGALG00000000312|ENSGALG00000000349|ENSGALG00000000352|ENSGALG00000000386|ENSGALG00000000410|ENSGALG00000000433|ENSGALG00000000463|ENSGALG00000000464|ENSGALG00000000490|ENSGALG00000000525|ENSGALG00000000550|ENSGALG00000000623|ENSGALG00000000628|…	1610	ENSGALG00000000004|ENSGALG00000000019|ENSGALG00000000041|ENSGALG00000000048|ENSGALG00000000059|ENSGALG00000000076|ENSGALG00000000102|ENSGALG00000000181|ENSGALG00000000189|ENSGALG00000000244|ENSGALG00000000273|ENSGALG00000000312|ENSGALG00000000349|ENSGALG00000000352|ENSGALG00000000366|ENSGALG00000000386|ENSGALG00000000410|ENSGALG00000000433|ENSGALG00000000463|ENSGALG00000000464|ENSGALG00000000466|…	http://amigo.geneontology.org/cgi-bin/amigo/term_details?term=GO:0032549	yes
GO:0032550	purine ribonucleoside binding	2.1e-09	7.6041e-07	1118	ENSGALG00000000019|ENSGALG00000000041|ENSGALG00000000048|ENSGALG00000000059|ENSGALG00000000181|ENSGALG00000000189|ENSGALG00000000244|ENSGALG00000000273|ENSGALG00000000312|ENSGALG00000000349|ENSGALG00000000352|ENSGALG00000000386|ENSGALG00000000410|ENSGALG00000000433|ENSGALG00000000463|ENSGALG00000000464|ENSGALG00000000490|ENSGALG00000000525|ENSGALG00000000550|ENSGALG00000000623|ENSGALG00000000628|…	1606	ENSGALG00000000004|ENSGALG00000000019|ENSGALG00000000041|ENSGALG00000000048|ENSGALG00000000059|ENSGALG00000000076|ENSGALG00000000102|ENSGALG00000000181|ENSGALG00000000189|ENSGALG00000000244|ENSGALG00000000273|ENSGALG00000000312|ENSGALG00000000349|ENSGALG00000000352|ENSGALG00000000366|ENSGALG00000000386|ENSGALG00000000410|ENSGALG00000000433|ENSGALG00000000463|ENSGALG00000000464|ENSGALG00000000466|…	http://amigo.geneontology.org/cgi-bin/amigo/term_details?term=GO:0032550	yes
GO:0001883	purine nucleoside binding	2.6e-09	8.55873e-07	1118	ENSGALG00000000019|ENSGALG00000000041|ENSGALG00000000048|ENSGALG00000000059|ENSGALG00000000181|ENSGALG00000000189|ENSGALG00000000244|ENSGALG00000000273|ENSGALG00000000312|ENSGALG00000000349|ENSGALG00000000352|ENSGALG00000000386|ENSGALG00000000410|ENSGALG00000000433|ENSGALG00000000463|ENSGALG00000000464|ENSGALG00000000490|ENSGALG00000000525|ENSGALG00000000550|ENSGALG00000000623|ENSGALG00000000628|…	1607	ENSGALG00000000004|ENSGALG00000000019|ENSGALG00000000041|ENSGALG00000000048|ENSGALG00000000059|ENSGALG00000000076|ENSGALG00000000102|ENSGALG00000000181|ENSGALG00000000189|ENSGALG00000000244|ENSGALG00000000273|ENSGALG00000000312|ENSGALG00000000349|ENSGALG00000000352|ENSGALG00000000366|ENSGALG00000000386|ENSGALG00000000410|ENSGALG00000000433|ENSGALG00000000463|ENSGALG00000000464|ENSGALG00000000466|…	http://amigo.geneontology.org/cgi-bin/amigo/term_details?term=GO:0001883	yes
GO:0035639	purine ribonucleoside triphosphate binding	2.9e-09	8.75075e-07	1115	ENSGALG00000000019|ENSGALG00000000041|ENSGALG00000000048|ENSGALG00000000059|ENSGALG00000000181|ENSGALG00000000189|ENSGALG00000000244|ENSGALG00000000273|ENSGALG00000000312|ENSGALG00000000349|ENSGALG00000000352|ENSGALG00000000386|ENSGALG00000000410|ENSGALG00000000433|ENSGALG00000000463|ENSGALG00000000464|ENSGALG00000000490|ENSGALG00000000525|ENSGALG00000000550|ENSGALG00000000623|ENSGALG00000000628|…	1603	ENSGALG00000000004|ENSGALG00000000019|ENSGALG00000000041|ENSGALG00000000048|ENSGALG00000000059|ENSGALG00000000076|ENSGALG00000000102|ENSGALG00000000181|ENSGALG00000000189|ENSGALG00000000244|ENSGALG00000000273|ENSGALG00000000312|ENSGALG00000000349|ENSGALG00000000352|ENSGALG00000000366|ENSGALG00000000386|ENSGALG00000000410|ENSGALG00000000433|ENSGALG00000000463|ENSGALG00000000464|ENSGALG00000000466|…	http://amigo.geneontology.org/cgi-bin/amigo/term_details?term=GO:0035639	yes
GO:0017076	purine nucleotide binding	3.3e-09	9.19177e-07	1141	ENSGALG00000000019|ENSGALG00000000041|ENSGALG00000000048|ENSGALG00000000059|ENSGALG00000000181|ENSGALG00000000189|ENSGALG00000000244|ENSGALG00000000273|ENSGALG00000000312|ENSGALG00000000349|ENSGALG00000000352|ENSGALG00000000386|ENSGALG00000000410|ENSGALG00000000433|ENSGALG00000000463|ENSGALG00000000464|ENSGALG00000000490|ENSGALG00000000525|ENSGALG00000000550|ENSGALG00000000623|ENSGALG00000000628|…	1643	ENSGALG00000000004|ENSGALG00000000019|ENSGALG00000000041|ENSGALG00000000048|ENSGALG00000000059|ENSGALG00000000076|ENSGALG00000000102|ENSGALG00000000181|ENSGALG00000000189|ENSGALG00000000244|ENSGALG00000000273|ENSGALG00000000312|ENSGALG00000000349|ENSGALG00000000352|ENSGALG00000000366|ENSGALG00000000386|ENSGALG00000000410|ENSGALG00000000433|ENSGALG00000000463|ENSGALG00000000464|ENSGALG00000000466|…	http://amigo.geneontology.org/cgi-bin/amigo/term_details?term=GO:0017076	yes
GO:0032555	purine ribonucleotide binding	3.8e-09	9.656e-07	1136	ENSGALG00000000019|ENSGALG00000000041|ENSGALG00000000048|ENSGALG00000000059|ENSGALG00000000181|ENSGALG00000000189|ENSGALG00000000244|ENSGALG00000000273|ENSGALG00000000312|ENSGALG00000000349|ENSGALG00000000352|ENSGALG00000000386|ENSGALG00000000410|ENSGALG00000000433|ENSGALG00000000463|ENSGALG00000000464|ENSGALG00000000490|ENSGALG00000000525|ENSGALG00000000550|ENSGALG00000000623|ENSGALG00000000628|…	1636	ENSGALG00000000004|ENSGALG00000000019|ENSGALG00000000041|ENSGALG00000000048|ENSGALG00000000059|ENSGALG00000000076|ENSGALG00000000102|ENSGALG00000000181|ENSGALG00000000189|ENSGALG00000000244|ENSGALG00000000273|ENSGALG00000000312|ENSGALG00000000349|ENSGALG00000000352|ENSGALG00000000366|ENSGALG00000000386|ENSGALG00000000410|ENSGALG00000000433|ENSGALG00000000463|ENSGALG00000000464|ENSGALG00000000466|…	http://amigo.geneontology.org/cgi-bin/amigo/term_details?term=GO:0032555	yes
GO:0032553	ribonucleotide binding	4e-09	9.656e-07	1145	ENSGALG00000000019|ENSGALG00000000041|ENSGALG00000000048|ENSGALG00000000059|ENSGALG00000000181|ENSGALG00000000189|ENSGALG00000000244|ENSGALG00000000273|ENSGALG00000000312|ENSGALG00000000349|ENSGALG00000000352|ENSGALG00000000386|ENSGALG00000000410|ENSGALG00000000433|ENSGALG00000000463|ENSGALG00000000464|ENSGALG00000000490|ENSGALG00000000525|ENSGALG00000000550|ENSGALG00000000623|ENSGALG00000000628|…	1650	ENSGALG00000000004|ENSGALG00000000019|ENSGALG00000000041|ENSGALG00000000048|ENSGALG00000000059|ENSGALG00000000076|ENSGALG00000000102|ENSGALG00000000181|ENSGALG00000000189|ENSGALG00000000244|ENSGALG00000000273|ENSGALG00000000312|ENSGALG00000000349|ENSGALG00000000352|ENSGALG00000000366|ENSGALG00000000386|ENSGALG00000000410|ENSGALG00000000433|ENSGALG00000000463|ENSGALG00000000464|ENSGALG00000000466|…	http://amigo.geneontology.org/cgi-bin/amigo/term_details?term=GO:0032553	yes
GO:0042623	ATPase activity, coupled	6.9e-08	1.18976e-05	178	ENSGALG00000000048|ENSGALG00000000181|ENSGALG00000000189|ENSGALG00000000349|ENSGALG00000000463|ENSGALG00000000490|ENSGALG00000000674|ENSGALG00000000733|ENSGALG00000000747|ENSGALG00000000787|ENSGALG00000001041|ENSGALG00000001084|ENSGALG00000001183|ENSGALG00000001186|ENSGALG00000001226|ENSGALG00000001504|ENSGALG00000001564|ENSGALG00000001630|ENSGALG00000001662|ENSGALG00000001756|ENSGALG00000001851|…	224	ENSGALG00000000048|ENSGALG00000000181|ENSGALG00000000189|ENSGALG00000000349|ENSGALG00000000463|ENSGALG00000000490|ENSGALG00000000674|ENSGALG00000000733|ENSGALG00000000747|ENSGALG00000000787|ENSGALG00000001041|ENSGALG00000001084|ENSGALG00000001183|ENSGALG00000001186|ENSGALG00000001226|ENSGALG00000001504|ENSGALG00000001564|ENSGALG00000001630|ENSGALG00000001662|ENSGALG00000001756|ENSGALG00000001851|…	http://amigo.geneontology.org/cgi-bin/amigo/term_details?term=GO:0042623	yes
GO:0019900	kinase binding	6.4e-07	0.000105338	195	ENSGALG00000000094|ENSGALG00000000122|ENSGALG00000000220|ENSGALG00000000264|ENSGALG00000000468|ENSGALG00000000550|ENSGALG00000000882|ENSGALG00000001006|ENSGALG00000001289|ENSGALG00000001301|ENSGALG00000001366|ENSGALG00000001419|ENSGALG00000001772|ENSGALG00000001775|ENSGALG00000001826|ENSGALG00000001833|ENSGALG00000001977|ENSGALG00000002028|ENSGALG00000002142|ENSGALG00000002175|ENSGALG00000002192|…	252	ENSGALG00000000094|ENSGALG00000000122|ENSGALG00000000220|ENSGALG00000000264|ENSGALG00000000468|ENSGALG00000000535|ENSGALG00000000550|ENSGALG00000000726|ENSGALG00000000788|ENSGALG00000000882|ENSGALG00000001006|ENSGALG00000001077|ENSGALG00000001118|ENSGALG00000001270|ENSGALG00000001289|ENSGALG00000001301|ENSGALG00000001366|ENSGALG00000001419|ENSGALG00000001583|ENSGALG00000001772|ENSGALG00000001775|…	http://amigo.geneontology.org/cgi-bin/amigo/term_details?term=GO:0019900	yes
GO:0017111	nucleoside-triphosphatase activity	7.4e-07	0.000116502	449	ENSGALG00000000041|ENSGALG00000000048|ENSGALG00000000059|ENSGALG00000000181|ENSGALG00000000189|ENSGALG00000000349|ENSGALG00000000386|ENSGALG00000000433|ENSGALG00000000463|ENSGALG00000000490|ENSGALG00000000628|ENSGALG00000000674|ENSGALG00000000720|ENSGALG00000000733|ENSGALG00000000747|ENSGALG00000000769|ENSGALG00000000779|ENSGALG00000000787|ENSGALG00000000878|ENSGALG00000000920|ENSGALG00000000988|…	623	ENSGALG00000000041|ENSGALG00000000048|ENSGALG00000000059|ENSGALG00000000181|ENSGALG00000000189|ENSGALG00000000349|ENSGALG00000000386|ENSGALG00000000433|ENSGALG00000000463|ENSGALG00000000490|ENSGALG00000000544|ENSGALG00000000581|ENSGALG00000000613|ENSGALG00000000628|ENSGALG00000000674|ENSGALG00000000712|ENSGALG00000000720|ENSGALG00000000733|ENSGALG00000000747|ENSGALG00000000769|ENSGALG00000000779|…	http://amigo.geneontology.org/cgi-bin/amigo/term_details?term=GO:0017111	yes
GO:0016462	pyrophosphatase activity	1.1e-06	0.000165963	469	ENSGALG00000000041|ENSGALG00000000048|ENSGALG00000000059|ENSGALG00000000181|ENSGALG00000000189|ENSGALG00000000215|ENSGALG00000000349|ENSGALG00000000386|ENSGALG00000000390|ENSGALG00000000433|ENSGALG00000000463|ENSGALG00000000490|ENSGALG00000000628|ENSGALG00000000674|ENSGALG00000000720|ENSGALG00000000733|ENSGALG00000000747|ENSGALG00000000769|ENSGALG00000000779|ENSGALG00000000787|ENSGALG00000000878|…	654	ENSGALG00000000041|ENSGALG00000000048|ENSGALG00000000059|ENSGALG00000000181|ENSGALG00000000189|ENSGALG00000000215|ENSGALG00000000349|ENSGALG00000000386|ENSGALG00000000390|ENSGALG00000000433|ENSGALG00000000463|ENSGALG00000000490|ENSGALG00000000544|ENSGALG00000000581|ENSGALG00000000613|ENSGALG00000000628|ENSGALG00000000674|ENSGALG00000000712|ENSGALG00000000720|ENSGALG00000000733|ENSGALG00000000747|…	http://amigo.geneontology.org/cgi-bin/amigo/term_details?term=GO:0016462	yes
GO:0016301	kinase activity	1.3e-06	0.000174344	486	ENSGALG00000000019|ENSGALG00000000123|ENSGALG00000000244|ENSGALG00000000273|ENSGALG00000000312|ENSGALG00000000410|ENSGALG00000000525|ENSGALG00000000623|ENSGALG00000000670|ENSGALG00000000680|ENSGALG00000000681|ENSGALG00000000692|ENSGALG00000000808|ENSGALG00000000823|ENSGALG00000000824|ENSGALG00000000883|ENSGALG00000000889|ENSGALG00000000890|ENSGALG00000000917|ENSGALG00000000970|ENSGALG00000001001|…	680	ENSGALG00000000004|ENSGALG00000000019|ENSGALG00000000076|ENSGALG00000000117|ENSGALG00000000123|ENSGALG00000000244|ENSGALG00000000273|ENSGALG00000000312|ENSGALG00000000366|ENSGALG00000000410|ENSGALG00000000466|ENSGALG00000000523|ENSGALG00000000525|ENSGALG00000000557|ENSGALG00000000623|ENSGALG00000000670|ENSGALG00000000680|ENSGALG00000000681|ENSGALG00000000685|ENSGALG00000000692|ENSGALG00000000736|…	http://amigo.geneontology.org/cgi-bin/amigo/term_details?term=GO:0016301	yes
GO:0003774	motor activity	1.3e-06	0.000174344	107	ENSGALG00000000628|ENSGALG00000000674|ENSGALG00000000733|ENSGALG00000000779|ENSGALG00000000878|ENSGALG00000000920|ENSGALG00000001020|ENSGALG00000001111|ENSGALG00000001183|ENSGALG00000001571|ENSGALG00000001798|ENSGALG00000001936|ENSGALG00000002078|ENSGALG00000002175|ENSGALG00000002350|ENSGALG00000002444|ENSGALG00000002709|ENSGALG00000002726|ENSGALG00000003007|ENSGALG00000003157|ENSGALG00000003170|…	130	ENSGALG00000000628|ENSGALG00000000674|ENSGALG00000000733|ENSGALG00000000779|ENSGALG00000000878|ENSGALG00000000920|ENSGALG00000001020|ENSGALG00000001111|ENSGALG00000001183|ENSGALG00000001571|ENSGALG00000001798|ENSGALG00000001913|ENSGALG00000001936|ENSGALG00000001996|ENSGALG00000002078|ENSGALG00000002175|ENSGALG00000002350|ENSGALG00000002444|ENSGALG00000002709|ENSGALG00000002726|ENSGALG00000003007|…	http://amigo.geneontology.org/cgi-bin/amigo/term_details?term=GO:0003774	yes
GO:0016818	hydrolase activity, acting on acid anhydrides, in phosphorus-containing anhydrides	2.5e-06	0.000323304	469	ENSGALG00000000041|ENSGALG00000000048|ENSGALG00000000059|ENSGALG00000000181|ENSGALG00000000189|ENSGALG00000000215|ENSGALG00000000349|ENSGALG00000000386|ENSGALG00000000390|ENSGALG00000000433|ENSGALG00000000463|ENSGALG00000000490|ENSGALG00000000628|ENSGALG00000000674|ENSGALG00000000720|ENSGALG00000000733|ENSGALG00000000747|ENSGALG00000000769|ENSGALG00000000779|ENSGALG00000000787|ENSGALG00000000878|…	657	ENSGALG00000000041|ENSGALG00000000048|ENSGALG00000000059|ENSGALG00000000181|ENSGALG00000000189|ENSGALG00000000215|ENSGALG00000000349|ENSGALG00000000386|ENSGALG00000000390|ENSGALG00000000433|ENSGALG00000000463|ENSGALG00000000490|ENSGALG00000000544|ENSGALG00000000581|ENSGALG00000000613|ENSGALG00000000628|ENSGALG00000000674|ENSGALG00000000712|ENSGALG00000000720|ENSGALG00000000733|ENSGALG00000000747|…	http://amigo.geneontology.org/cgi-bin/amigo/term_details?term=GO:0016818	yes
GO:0019901	protein kinase binding	2.9e-06	0.00035003	176	ENSGALG00000000094|ENSGALG00000000122|ENSGALG00000000220|ENSGALG00000000264|ENSGALG00000000468|ENSGALG00000000882|ENSGALG00000001006|ENSGALG00000001289|ENSGALG00000001301|ENSGALG00000001366|ENSGALG00000001419|ENSGALG00000001772|ENSGALG00000001775|ENSGALG00000001833|ENSGALG00000001977|ENSGALG00000002028|ENSGALG00000002175|ENSGALG00000002192|ENSGALG00000002225|ENSGALG00000002283|ENSGALG00000002678|…	228	ENSGALG00000000094|ENSGALG00000000122|ENSGALG00000000220|ENSGALG00000000264|ENSGALG00000000468|ENSGALG00000000535|ENSGALG00000000726|ENSGALG00000000788|ENSGALG00000000882|ENSGALG00000001006|ENSGALG00000001077|ENSGALG00000001118|ENSGALG00000001270|ENSGALG00000001289|ENSGALG00000001301|ENSGALG00000001366|ENSGALG00000001419|ENSGALG00000001583|ENSGALG00000001772|ENSGALG00000001775|ENSGALG00000001833|…	http://amigo.geneontology.org/cgi-bin/amigo/term_details?term=GO:0019901	yes
GO:0016817	hydrolase activity, acting on acid anhydrides	2.9e-06	0.00035003	470	ENSGALG00000000041|ENSGALG00000000048|ENSGALG00000000059|ENSGALG00000000181|ENSGALG00000000189|ENSGALG00000000215|ENSGALG00000000349|ENSGALG00000000386|ENSGALG00000000390|ENSGALG00000000433|ENSGALG00000000463|ENSGALG00000000490|ENSGALG00000000628|ENSGALG00000000674|ENSGALG00000000720|ENSGALG00000000733|ENSGALG00000000747|ENSGALG00000000769|ENSGALG00000000779|ENSGALG00000000787|ENSGALG00000000878|…	659	ENSGALG00000000041|ENSGALG00000000048|ENSGALG00000000059|ENSGALG00000000181|ENSGALG00000000189|ENSGALG00000000215|ENSGALG00000000349|ENSGALG00000000386|ENSGALG00000000390|ENSGALG00000000433|ENSGALG00000000463|ENSGALG00000000490|ENSGALG00000000544|ENSGALG00000000581|ENSGALG00000000613|ENSGALG00000000628|ENSGALG00000000674|ENSGALG00000000712|ENSGALG00000000720|ENSGALG00000000733|ENSGALG00000000747|…	http://amigo.geneontology.org/cgi-bin/amigo/term_details?term=GO:0016817	yes
GO:0016773	phosphotransferase activity, alcohol group as acceptor	4.1e-06	0.000478906	441	ENSGALG00000000019|ENSGALG00000000123|ENSGALG00000000244|ENSGALG00000000273|ENSGALG00000000312|ENSGALG00000000410|ENSGALG00000000525|ENSGALG00000000623|ENSGALG00000000670|ENSGALG00000000680|ENSGALG00000000681|ENSGALG00000000692|ENSGALG00000000808|ENSGALG00000000823|ENSGALG00000000824|ENSGALG00000000883|ENSGALG00000000889|ENSGALG00000000890|ENSGALG00000000917|ENSGALG00000000970|ENSGALG00000001001|…	617	ENSGALG00000000004|ENSGALG00000000019|ENSGALG00000000076|ENSGALG00000000117|ENSGALG00000000123|ENSGALG00000000244|ENSGALG00000000273|ENSGALG00000000312|ENSGALG00000000366|ENSGALG00000000410|ENSGALG00000000466|ENSGALG00000000523|ENSGALG00000000525|ENSGALG00000000557|ENSGALG00000000623|ENSGALG00000000670|ENSGALG00000000680|ENSGALG00000000681|ENSGALG00000000685|ENSGALG00000000692|ENSGALG00000000736|…	http://amigo.geneontology.org/cgi-bin/amigo/term_details?term=GO:0016773	yes
GO:0004714	transmembrane receptor protein tyrosine kinase activity	4.8e-06	0.00054315	52	ENSGALG00000000123|ENSGALG00000000917|ENSGALG00000001741|ENSGALG00000001840|ENSGALG00000001912|ENSGALG00000002555|ENSGALG00000003103|ENSGALG00000003126|ENSGALG00000003311|ENSGALG00000003579|ENSGALG00000004741|ENSGALG00000005725|ENSGALG00000005802|ENSGALG00000006609|ENSGALG00000006793|ENSGALG00000007140|ENSGALG00000007646|ENSGALG00000007908|ENSGALG00000008257|ENSGALG00000008537|ENSGALG00000008615|…	58	ENSGALG00000000117|ENSGALG00000000123|ENSGALG00000000917|ENSGALG00000001741|ENSGALG00000001840|ENSGALG00000001912|ENSGALG00000002555|ENSGALG00000003103|ENSGALG00000003126|ENSGALG00000003311|ENSGALG00000003579|ENSGALG00000004741|ENSGALG00000005256|ENSGALG00000005725|ENSGALG00000005802|ENSGALG00000006609|ENSGALG00000006793|ENSGALG00000007039|ENSGALG00000007140|ENSGALG00000007646|ENSGALG00000007908|…	http://amigo.geneontology.org/cgi-bin/amigo/term_details?term=GO:0004714	yes
GO:0019899	enzyme binding	5.8e-06	0.000636418	535	ENSGALG00000000094|ENSGALG00000000104|ENSGALG00000000122|ENSGALG00000000189|ENSGALG00000000220|ENSGALG00000000230|ENSGALG00000000264|ENSGALG00000000379|ENSGALG00000000397|ENSGALG00000000454|ENSGALG00000000468|ENSGALG00000000533|ENSGALG00000000550|ENSGALG00000000577|ENSGALG00000000636|ENSGALG00000000681|ENSGALG00000000694|ENSGALG00000000713|ENSGALG00000000734|ENSGALG00000000740|ENSGALG00000000745|…	759	ENSGALG00000000094|ENSGALG00000000102|ENSGALG00000000104|ENSGALG00000000122|ENSGALG00000000189|ENSGALG00000000220|ENSGALG00000000230|ENSGALG00000000233|ENSGALG00000000264|ENSGALG00000000379|ENSGALG00000000397|ENSGALG00000000454|ENSGALG00000000468|ENSGALG00000000533|ENSGALG00000000535|ENSGALG00000000550|ENSGALG00000000577|ENSGALG00000000636|ENSGALG00000000681|ENSGALG00000000694|ENSGALG00000000713|…	http://amigo.geneontology.org/cgi-bin/amigo/term_details?term=GO:0019899	yes
GO:0005085	guanyl-nucleotide exchange factor activity	2.1e-05	0.00211225	124	ENSGALG00000000154|ENSGALG00000000436|ENSGALG00000000449|ENSGALG00000000899|ENSGALG00000000906|ENSGALG00000000993|ENSGALG00000001058|ENSGALG00000001174|ENSGALG00000001255|ENSGALG00000001505|ENSGALG00000001915|ENSGALG00000002080|ENSGALG00000002193|ENSGALG00000002246|ENSGALG00000002394|ENSGALG00000002525|ENSGALG00000002599|ENSGALG00000002699|ENSGALG00000003381|ENSGALG00000003412|ENSGALG00000003572|…	158	ENSGALG00000000154|ENSGALG00000000311|ENSGALG00000000436|ENSGALG00000000449|ENSGALG00000000899|ENSGALG00000000906|ENSGALG00000000993|ENSGALG00000001058|ENSGALG00000001157|ENSGALG00000001174|ENSGALG00000001255|ENSGALG00000001476|ENSGALG00000001505|ENSGALG00000001894|ENSGALG00000001915|ENSGALG00000002038|ENSGALG00000002080|ENSGALG00000002193|ENSGALG00000002246|ENSGALG00000002335|ENSGALG00000002394|…	http://amigo.geneontology.org/cgi-bin/amigo/term_details?term=GO:0005085	yes
GO:0004672	protein kinase activity	2.1e-05	0.00211225	374	ENSGALG00000000019|ENSGALG00000000123|ENSGALG00000000244|ENSGALG00000000273|ENSGALG00000000312|ENSGALG00000000410|ENSGALG00000000525|ENSGALG00000000670|ENSGALG00000000680|ENSGALG00000000681|ENSGALG00000000692|ENSGALG00000000808|ENSGALG00000000823|ENSGALG00000000824|ENSGALG00000000883|ENSGALG00000000889|ENSGALG00000000890|ENSGALG00000000917|ENSGALG00000000970|ENSGALG00000001001|ENSGALG00000001076|…	523	ENSGALG00000000019|ENSGALG00000000076|ENSGALG00000000117|ENSGALG00000000123|ENSGALG00000000244|ENSGALG00000000273|ENSGALG00000000312|ENSGALG00000000366|ENSGALG00000000410|ENSGALG00000000466|ENSGALG00000000523|ENSGALG00000000525|ENSGALG00000000670|ENSGALG00000000680|ENSGALG00000000681|ENSGALG00000000685|ENSGALG00000000692|ENSGALG00000000736|ENSGALG00000000742|ENSGALG00000000808|ENSGALG00000000810|…	http://amigo.geneontology.org/cgi-bin/amigo/term_details?term=GO:0004672	yes
GO:0003777	microtubule motor activity	3.4e-05	0.00332741	59	ENSGALG00000000628|ENSGALG00000000878|ENSGALG00000001020|ENSGALG00000001111|ENSGALG00000001798|ENSGALG00000002175|ENSGALG00000002350|ENSGALG00000002726|ENSGALG00000003007|ENSGALG00000003170|ENSGALG00000003231|ENSGALG00000004195|ENSGALG00000004297|ENSGALG00000004495|ENSGALG00000004502|ENSGALG00000005314|ENSGALG00000005517|ENSGALG00000005601|ENSGALG00000005806|ENSGALG00000006221|ENSGALG00000006604|…	69	ENSGALG00000000628|ENSGALG00000000878|ENSGALG00000001020|ENSGALG00000001111|ENSGALG00000001798|ENSGALG00000001913|ENSGALG00000002175|ENSGALG00000002350|ENSGALG00000002726|ENSGALG00000003007|ENSGALG00000003170|ENSGALG00000003231|ENSGALG00000003571|ENSGALG00000004195|ENSGALG00000004297|ENSGALG00000004495|ENSGALG00000004502|ENSGALG00000005241|ENSGALG00000005314|ENSGALG00000005517|ENSGALG00000005601|…	http://amigo.geneontology.org/cgi-bin/amigo/term_details?term=GO:0003777	yes
GO:0004713	protein tyrosine kinase activity	4.5e-05	0.00428803	106	ENSGALG00000000123|ENSGALG00000000273|ENSGALG00000000670|ENSGALG00000000823|ENSGALG00000000917|ENSGALG00000001001|ENSGALG00000001267|ENSGALG00000001318|ENSGALG00000001362|ENSGALG00000001486|ENSGALG00000001741|ENSGALG00000001840|ENSGALG00000001912|ENSGALG00000002555|ENSGALG00000002759|ENSGALG00000003103|ENSGALG00000003126|ENSGALG00000003311|ENSGALG00000003579|ENSGALG00000003857|ENSGALG00000003875|…	134	ENSGALG00000000117|ENSGALG00000000123|ENSGALG00000000273|ENSGALG00000000466|ENSGALG00000000670|ENSGALG00000000736|ENSGALG00000000810|ENSGALG00000000823|ENSGALG00000000863|ENSGALG00000000917|ENSGALG00000001001|ENSGALG00000001267|ENSGALG00000001318|ENSGALG00000001362|ENSGALG00000001486|ENSGALG00000001741|ENSGALG00000001840|ENSGALG00000001912|ENSGALG00000002016|ENSGALG00000002555|ENSGALG00000002759|…	http://amigo.geneontology.org/cgi-bin/amigo/term_details?term=GO:0004713	yes
GO:0004386	helicase activity	5e-05	0.00464231	103	ENSGALG00000000189|ENSGALG00000000463|ENSGALG00000000747|ENSGALG00000000787|ENSGALG00000001186|ENSGALG00000001504|ENSGALG00000001558|ENSGALG00000001616|ENSGALG00000001630|ENSGALG00000002164|ENSGALG00000002336|ENSGALG00000002424|ENSGALG00000002964|ENSGALG00000003030|ENSGALG00000003130|ENSGALG00000003220|ENSGALG00000003243|ENSGALG00000003298|ENSGALG00000003415|ENSGALG00000003477|ENSGALG00000003534|…	130	ENSGALG00000000189|ENSGALG00000000463|ENSGALG00000000581|ENSGALG00000000747|ENSGALG00000000787|ENSGALG00000001186|ENSGALG00000001504|ENSGALG00000001558|ENSGALG00000001616|ENSGALG00000001630|ENSGALG00000002164|ENSGALG00000002336|ENSGALG00000002424|ENSGALG00000002964|ENSGALG00000003030|ENSGALG00000003130|ENSGALG00000003220|ENSGALG00000003243|ENSGALG00000003298|ENSGALG00000003415|ENSGALG00000003477|…	http://amigo.geneontology.org/cgi-bin/amigo/term_details?term=GO:0004386	yes
GO:0008270	zinc ion binding	7.1e-05	0.00642727	674	ENSGALG00000000107|ENSGALG00000000113|ENSGALG00000000123|ENSGALG00000000151|ENSGALG00000000160|ENSGALG00000000255|ENSGALG00000000264|ENSGALG00000000270|ENSGALG00000000300|ENSGALG00000000357|ENSGALG00000000388|ENSGALG00000000427|ENSGALG00000000436|ENSGALG00000000454|ENSGALG00000000618|ENSGALG00000000636|ENSGALG00000000710|ENSGALG00000000713|ENSGALG00000000747|ENSGALG00000000766|ENSGALG00000000823|…	981	ENSGALG00000000107|ENSGALG00000000113|ENSGALG00000000117|ENSGALG00000000123|ENSGALG00000000151|ENSGALG00000000160|ENSGALG00000000255|ENSGALG00000000264|ENSGALG00000000270|ENSGALG00000000300|ENSGALG00000000318|ENSGALG00000000357|ENSGALG00000000374|ENSGALG00000000388|ENSGALG00000000427|ENSGALG00000000436|ENSGALG00000000454|ENSGALG00000000513|ENSGALG00000000529|ENSGALG00000000538|ENSGALG00000000599|…	http://amigo.geneontology.org/cgi-bin/amigo/term_details?term=GO:0008270	yes
GO:0030695	GTPase regulator activity	7.7e-05	0.00680041	193	ENSGALG00000000132|ENSGALG00000000188|ENSGALG00000000527|ENSGALG00000000753|ENSGALG00000000816|ENSGALG00000000839|ENSGALG00000000847|ENSGALG00000000993|ENSGALG00000001192|ENSGALG00000001225|ENSGALG00000001244|ENSGALG00000001311|ENSGALG00000001419|ENSGALG00000001420|ENSGALG00000001710|ENSGALG00000001737|ENSGALG00000001770|ENSGALG00000001797|ENSGALG00000001874|ENSGALG00000001876|ENSGALG00000001915|…	260	ENSGALG00000000132|ENSGALG00000000188|ENSGALG00000000527|ENSGALG00000000753|ENSGALG00000000816|ENSGALG00000000839|ENSGALG00000000847|ENSGALG00000000993|ENSGALG00000001192|ENSGALG00000001225|ENSGALG00000001244|ENSGALG00000001311|ENSGALG00000001419|ENSGALG00000001420|ENSGALG00000001503|ENSGALG00000001710|ENSGALG00000001737|ENSGALG00000001770|ENSGALG00000001797|ENSGALG00000001874|ENSGALG00000001876|…	http://amigo.geneontology.org/cgi-bin/amigo/term_details?term=GO:0030695	yes
GO:0016772	transferase activity, transferring phosphorus-containing groups	8.4e-05	0.007242	555	ENSGALG00000000019|ENSGALG00000000123|ENSGALG00000000142|ENSGALG00000000244|ENSGALG00000000273|ENSGALG00000000312|ENSGALG00000000410|ENSGALG00000000525|ENSGALG00000000623|ENSGALG00000000670|ENSGALG00000000680|ENSGALG00000000681|ENSGALG00000000692|ENSGALG00000000808|ENSGALG00000000823|ENSGALG00000000824|ENSGALG00000000883|ENSGALG00000000889|ENSGALG00000000890|ENSGALG00000000917|ENSGALG00000000970|…	801	ENSGALG00000000004|ENSGALG00000000019|ENSGALG00000000076|ENSGALG00000000117|ENSGALG00000000123|ENSGALG00000000142|ENSGALG00000000165|ENSGALG00000000244|ENSGALG00000000273|ENSGALG00000000285|ENSGALG00000000312|ENSGALG00000000366|ENSGALG00000000410|ENSGALG00000000466|ENSGALG00000000523|ENSGALG00000000525|ENSGALG00000000557|ENSGALG00000000623|ENSGALG00000000670|ENSGALG00000000680|ENSGALG00000000681|…	http://amigo.geneontology.org/cgi-bin/amigo/term_details?term=GO:0016772	yes
GO:0022804	active transmembrane transporter activity	0.00011	0.0090525	206	ENSGALG00000000048|ENSGALG00000000086|ENSGALG00000000181|ENSGALG00000000195|ENSGALG00000000352|ENSGALG00000000394|ENSGALG00000000417|ENSGALG00000000530|ENSGALG00000000558|ENSGALG00000000722|ENSGALG00000000745|ENSGALG00000000844|ENSGALG00000000853|ENSGALG00000000921|ENSGALG00000001045|ENSGALG00000001226|ENSGALG00000001239|ENSGALG00000001374|ENSGALG00000001564|ENSGALG00000001661|ENSGALG00000001693|…	280	ENSGALG00000000048|ENSGALG00000000086|ENSGALG00000000181|ENSGALG00000000195|ENSGALG00000000352|ENSGALG00000000356|ENSGALG00000000394|ENSGALG00000000417|ENSGALG00000000530|ENSGALG00000000558|ENSGALG00000000722|ENSGALG00000000745|ENSGALG00000000844|ENSGALG00000000853|ENSGALG00000000860|ENSGALG00000000921|ENSGALG00000001045|ENSGALG00000001226|ENSGALG00000001239|ENSGALG00000001374|ENSGALG00000001564|…	http://amigo.geneontology.org/cgi-bin/amigo/term_details?term=GO:0022804	yes
GO:0019199	transmembrane receptor protein kinase activity	0.00011	0.0090525	61	ENSGALG00000000123|ENSGALG00000000917|ENSGALG00000001741|ENSGALG00000001840|ENSGALG00000001912|ENSGALG00000002555|ENSGALG00000003103|ENSGALG00000003126|ENSGALG00000003311|ENSGALG00000003579|ENSGALG00000004741|ENSGALG00000005725|ENSGALG00000005802|ENSGALG00000006038|ENSGALG00000006158|ENSGALG00000006609|ENSGALG00000006793|ENSGALG00000007140|ENSGALG00000007646|ENSGALG00000007908|ENSGALG00000008257|…	73	ENSGALG00000000117|ENSGALG00000000123|ENSGALG00000000917|ENSGALG00000001741|ENSGALG00000001840|ENSGALG00000001912|ENSGALG00000002003|ENSGALG00000002555|ENSGALG00000003103|ENSGALG00000003126|ENSGALG00000003311|ENSGALG00000003579|ENSGALG00000004741|ENSGALG00000005060|ENSGALG00000005256|ENSGALG00000005725|ENSGALG00000005802|ENSGALG00000006038|ENSGALG00000006158|ENSGALG00000006609|ENSGALG00000006793|…	http://amigo.geneontology.org/cgi-bin/amigo/term_details?term=GO:0019199	yes
GO:0050839	cell adhesion molecule binding	0.00031	0.0244024	78	ENSGALG00000000182|ENSGALG00000000379|ENSGALG00000000653|ENSGALG00000000909|ENSGALG00000001370|ENSGALG00000001412|ENSGALG00000001472|ENSGALG00000001705|ENSGALG00000001741|ENSGALG00000001768|ENSGALG00000001944|ENSGALG00000002389|ENSGALG00000002447|ENSGALG00000002546|ENSGALG00000002845|ENSGALG00000002909|ENSGALG00000003028|ENSGALG00000003115|ENSGALG00000003135|ENSGALG00000003398|ENSGALG00000003437|…	98	ENSGALG00000000182|ENSGALG00000000379|ENSGALG00000000653|ENSGALG00000000909|ENSGALG00000001370|ENSGALG00000001412|ENSGALG00000001472|ENSGALG00000001705|ENSGALG00000001741|ENSGALG00000001768|ENSGALG00000001944|ENSGALG00000002389|ENSGALG00000002447|ENSGALG00000002546|ENSGALG00000002845|ENSGALG00000002909|ENSGALG00000003028|ENSGALG00000003115|ENSGALG00000003135|ENSGALG00000003398|ENSGALG00000003437|…	http://amigo.geneontology.org/cgi-bin/amigo/term_details?term=GO:0050839	yes
GO:0005088	Ras guanyl-nucleotide exchange factor activity	0.00034	0.0261945	85	ENSGALG00000000154|ENSGALG00000000449|ENSGALG00000000906|ENSGALG00000001058|ENSGALG00000001174|ENSGALG00000001255|ENSGALG00000001505|ENSGALG00000001915|ENSGALG00000002080|ENSGALG00000002193|ENSGALG00000002246|ENSGALG00000002394|ENSGALG00000002525|ENSGALG00000002599|ENSGALG00000002699|ENSGALG00000003572|ENSGALG00000003712|ENSGALG00000004364|ENSGALG00000004621|ENSGALG00000004728|ENSGALG00000004754|…	108	ENSGALG00000000154|ENSGALG00000000449|ENSGALG00000000906|ENSGALG00000001058|ENSGALG00000001157|ENSGALG00000001174|ENSGALG00000001255|ENSGALG00000001476|ENSGALG00000001505|ENSGALG00000001894|ENSGALG00000001915|ENSGALG00000002038|ENSGALG00000002080|ENSGALG00000002193|ENSGALG00000002246|ENSGALG00000002394|ENSGALG00000002525|ENSGALG00000002599|ENSGALG00000002699|ENSGALG00000003572|ENSGALG00000003712|…	http://amigo.geneontology.org/cgi-bin/amigo/term_details?term=GO:0005088	yes
GO:0051020	GTPase binding	0.00035	0.0264031	97	ENSGALG00000000397|ENSGALG00000000468|ENSGALG00000000577|ENSGALG00000000681|ENSGALG00000000694|ENSGALG00000000816|ENSGALG00000001058|ENSGALG00000001214|ENSGALG00000001225|ENSGALG00000001467|ENSGALG00000001864|ENSGALG00000002064|ENSGALG00000002184|ENSGALG00000002234|ENSGALG00000002371|ENSGALG00000002394|ENSGALG00000002403|ENSGALG00000002453|ENSGALG00000003129|ENSGALG00000003227|ENSGALG00000003904|…	125	ENSGALG00000000397|ENSGALG00000000468|ENSGALG00000000577|ENSGALG00000000681|ENSGALG00000000694|ENSGALG00000000816|ENSGALG00000000848|ENSGALG00000001058|ENSGALG00000001214|ENSGALG00000001225|ENSGALG00000001467|ENSGALG00000001602|ENSGALG00000001864|ENSGALG00000002064|ENSGALG00000002107|ENSGALG00000002184|ENSGALG00000002234|ENSGALG00000002371|ENSGALG00000002394|ENSGALG00000002395|ENSGALG00000002403|…	http://amigo.geneontology.org/cgi-bin/amigo/term_details?term=GO:0051020	yes
GO:0047485	protein N-terminus binding	0.00047	0.034732	29	ENSGALG00000001309|ENSGALG00000002159|ENSGALG00000002969|ENSGALG00000002981|ENSGALG00000003120|ENSGALG00000003500|ENSGALG00000003605|ENSGALG00000003882|ENSGALG00000004534|ENSGALG00000004570|ENSGALG00000005048|ENSGALG00000005762|ENSGALG00000006254|ENSGALG00000008477|ENSGALG00000009003|ENSGALG00000011910|ENSGALG00000013312|ENSGALG00000013573|ENSGALG00000013837|ENSGALG00000015912|ENSGALG00000016617|…	32	ENSGALG00000001309|ENSGALG00000002159|ENSGALG00000002836|ENSGALG00000002969|ENSGALG00000002981|ENSGALG00000003120|ENSGALG00000003500|ENSGALG00000003605|ENSGALG00000003882|ENSGALG00000004534|ENSGALG00000004570|ENSGALG00000005048|ENSGALG00000005762|ENSGALG00000006254|ENSGALG00000008477|ENSGALG00000009003|ENSGALG00000011910|ENSGALG00000013312|ENSGALG00000013573|ENSGALG00000013837|ENSGALG00000015436|…	http://amigo.geneontology.org/cgi-bin/amigo/term_details?term=GO:0047485	yes
GO:0008026	ATP-dependent helicase activity	0.00052	0.0369063	58	ENSGALG00000000189|ENSGALG00000000463|ENSGALG00000000747|ENSGALG00000000787|ENSGALG00000001186|ENSGALG00000001504|ENSGALG00000001630|ENSGALG00000002164|ENSGALG00000002424|ENSGALG00000002964|ENSGALG00000003030|ENSGALG00000003130|ENSGALG00000003220|ENSGALG00000003415|ENSGALG00000003477|ENSGALG00000003534|ENSGALG00000004197|ENSGALG00000004328|ENSGALG00000005027|ENSGALG00000005126|ENSGALG00000005279|…	71	ENSGALG00000000189|ENSGALG00000000463|ENSGALG00000000747|ENSGALG00000000787|ENSGALG00000001186|ENSGALG00000001504|ENSGALG00000001630|ENSGALG00000002164|ENSGALG00000002424|ENSGALG00000002964|ENSGALG00000003030|ENSGALG00000003130|ENSGALG00000003220|ENSGALG00000003415|ENSGALG00000003477|ENSGALG00000003532|ENSGALG00000003534|ENSGALG00000003658|ENSGALG00000004144|ENSGALG00000004197|ENSGALG00000004328|…	http://amigo.geneontology.org/cgi-bin/amigo/term_details?term=GO:0008026	yes
GO:0070035	purine NTP-dependent helicase activity	0.00052	0.0369063	58	ENSGALG00000000189|ENSGALG00000000463|ENSGALG00000000747|ENSGALG00000000787|ENSGALG00000001186|ENSGALG00000001504|ENSGALG00000001630|ENSGALG00000002164|ENSGALG00000002424|ENSGALG00000002964|ENSGALG00000003030|ENSGALG00000003130|ENSGALG00000003220|ENSGALG00000003415|ENSGALG00000003477|ENSGALG00000003534|ENSGALG00000004197|ENSGALG00000004328|ENSGALG00000005027|ENSGALG00000005126|ENSGALG00000005279|…	71	ENSGALG00000000189|ENSGALG00000000463|ENSGALG00000000747|ENSGALG00000000787|ENSGALG00000001186|ENSGALG00000001504|ENSGALG00000001630|ENSGALG00000002164|ENSGALG00000002424|ENSGALG00000002964|ENSGALG00000003030|ENSGALG00000003130|ENSGALG00000003220|ENSGALG00000003415|ENSGALG00000003477|ENSGALG00000003532|ENSGALG00000003534|ENSGALG00000003658|ENSGALG00000004144|ENSGALG00000004197|ENSGALG00000004328|…	http://amigo.geneontology.org/cgi-bin/amigo/term_details?term=GO:0070035	yes
GO:0005096	GTPase activator activity	0.00053	0.0369063	175	ENSGALG00000000132|ENSGALG00000000527|ENSGALG00000000753|ENSGALG00000000816|ENSGALG00000000839|ENSGALG00000000847|ENSGALG00000000993|ENSGALG00000001192|ENSGALG00000001225|ENSGALG00000001244|ENSGALG00000001311|ENSGALG00000001419|ENSGALG00000001420|ENSGALG00000001710|ENSGALG00000001737|ENSGALG00000001770|ENSGALG00000001874|ENSGALG00000001876|ENSGALG00000001915|ENSGALG00000001944|ENSGALG00000002078|…	239	ENSGALG00000000132|ENSGALG00000000527|ENSGALG00000000753|ENSGALG00000000816|ENSGALG00000000839|ENSGALG00000000847|ENSGALG00000000993|ENSGALG00000001192|ENSGALG00000001225|ENSGALG00000001244|ENSGALG00000001311|ENSGALG00000001419|ENSGALG00000001420|ENSGALG00000001503|ENSGALG00000001710|ENSGALG00000001737|ENSGALG00000001770|ENSGALG00000001874|ENSGALG00000001876|ENSGALG00000001915|ENSGALG00000001944|…	http://amigo.geneontology.org/cgi-bin/amigo/term_details?term=GO:0005096	yes
